# Supplementary material
Source: PubMed Central journal article supplement (PMC3612632)
Supplement: 1222085110_sapp.pdf [file 1222085110_sapp.pdf]

## Supplementary methods

### Microarray gene expression profiling

Full description of the methods and results for each experiment are available at [http://www.ebi.ac.uk/microarray-as/aer/#ae-main\[0\]](http://www.ebi.ac.uk/microarray-as/aer/#ae-main[0]) (accession numbers E-NCMF-21 and E-NCMF-27 for rat and human data, respectively). The Agilent human probes that were significantly up- or down-regulated by both Fra-1 shRNAs ( $p < 1.10^{-6}$ ) were selected and mapped to the corresponding Affymetrix U133A probes using Martview from BioMart (<http://www.biomart.org/index.html>). We selected a single Affymetrix HGU-133A probe for each Entrez ID based on the Affymetrix algorithm probe extension, favoring ‘\_at’ over ‘\_x\_at’ over ‘\_s\_at’. Expression of remaining duplicate probes were averaged, resulting in a 1234 probe set.

### Classifier generation and analysis

We collected six publicly available datasets based on Human Genome HGU-133A Affymetrix arrays from NCBI’s Gene Expression Omnibus (GEO, <http://www.ncbi.nlm.nih.gov/geo/>) with the following identifiers; GSE6532 (1), GSE3494 (2), GSE1456 (3), GSE7390 (4) and GSE5327 (5). The Chin et al. (6) data set was downloaded from ArrayExpress (<http://www.ebi.ac.uk/>, identifier E-TABM-158).

To ensure comparability between the different datasets, they were all subjected to the same pre-processing procedure. Microarray quality-control assessment was carried out using the R AffyPLM package (Bioconductor, <http://www.bioconductor.org>). We applied the Relative Log Expression (RLE) and Normalized Unscaled Standard Errors (NUSE) tests. Chip pseudo-images were produced to assess artefacts, and 1 to 5% of the arrays of the

datasets did not pass the quality control tests. Selected arrays were normalized according to a 3-step procedure using the RMA expression measure algorithm

(<http://www.bioconductor.org>): RMA background correction convolution, median centering of each gene across arrays separately for each data set and quantile normalization of all arrays. Out of the 947 unique collected microarray samples of sufficient quality, 509 had Distant Metastasis Free Survival (DMFS) data available. We employed these samples as training set, and will denote this sets as the ‘Affymetrix training set’.

From the experimental Fra-1 signature 1234 unique probes, probes were extracted that exhibited a significant P-value ( $P < 0.05$ , log-rank test) on the Affymetrix training set. This resulted in a subset of 183 probes. Next, we employed the Affymetrix training set to define a nearest centroid classifier for these 183 probes. The ‘poor prognosis’ centroid was derived from the samples with a metastatic event before 60 months of follow-up. The ‘good prognosis’ centroid was derived from the samples with no metastatic event and a follow-up longer than 60 months.

For the analysis of publicly available datasets and comparison with other signatures, the genes or probe-sets in every signature were classified as UP if they were associated with cancer or poor prognosis in the definition of the signature and classified as DOWN otherwise. For a given signature S and dataset D, the genes or probe-sets of S were mapped to the genes or probe-sets of D. If a single gene or probe-set in S mapped to multiple genes or probe-sets of D, then the gene or probe-set of D with the most variance across D was used. For each signature S and patient W in D, we defined the signature activation to be the mean of the expression levels in W of the UP genes of S minus the mean of the expression levels in W of the DOWN genes of S. To form Figure 3B, for each signature and dataset, a Cox proportional hazards model was fit to the signature activation and the time to distant metastasis (if available) or relapse.

Fig. 3C and Fig. S10 were made as follows. Signature activations were computed as described above. Then, for each subtype (e.g., ER pos / Her2 neg), for each dataset the patients belonging to the subtype were classified as signature-high if their signature activations were above the median signature activation for patients in that dataset and subtype and as signature-low otherwise. Then a log-rank analysis was performed comparing all the signature-high patients belonging to the subtype in all the datasets with all the signature-low patients belonging to the subtype in all the datasets. The datasets were combined in this way to achieve sufficient power. We had ER and Her2 subtype information for only a subset of the datasets. The survival data used for the log-rank and Cox proportional hazards analysis was time to distant metastasis (if available) or relapse.

### **Antibodies**

BDNF (N-20), Fra-1 (R-20), and Trk (C-14) antibodies were from Santa Cruz,  $\alpha$ -catenin (610193),  $\beta$ -catenin (14),  $\gamma$ -catenin (610253) and E-cadherin (610181) antibodies were from Becton Dickinson.  $\alpha$ -tubulin antibody (DM1A) was from Sigma. Vimentin antibody (SP20) was from Thermo Scientific. GFP antibody (6556) was from Abcam. Phospho-ERK antibody (9106) was from Cell Signaling.

### **Immunofluorescence**

Immunofluorescence experiments were performed as previously described (47). Fra-1 antibody (1:200), E-cadherin antibody (1:200), Alexa568-coupled phalloidin (A12380, Invitrogen; 1:200),  $\alpha$ -tubulin antibody (T9026, Sigma; 1:3000) and an AlexaFluor647-coupled goat-anti-mouse secondary antibody (A21237, Invitrogen; 1:500) were used.

### **Immunohistochemistry**

Histological sections and haematoxylin-eosin staining were performed using standard procedures. Paraffin sections were deparaffinized, rehydrated, pretreated in 0.1 mM sodium citrate pH 6.0, washed and incubated with peroxide. The tissue was incubated with primary antibodies for Fra-1 (1:200) or Vimentin (1:200). Secondary antibody was PowerVision + (DPVB + 999HRP; ImmunoLogic). Peroxidase activity was detected with Liquid DAB (K3468; DAKO).

### **Gel shift experiments**

Gel shift experiments were performed as previously described (7). The sense strand of the AP-1 probe used had the following sequence: 5'-GGTTCGCTTGATGAGTCAGCCGGAA-3'. For supershift experiments, the nuclear extracts were pre-incubated with 2 µg of anti-Fra-1 antibody for 30 min.

### **Real-Time RT-PCR**

RT-PCR experiments were performed as previously described (8). The sequence of the primer sets used are described in Table S2. Rat Fra-1 mRNA levels were normalized using rat HPRT1 mRNA levels and human Adenosine receptors mRNA levels were normalized using human beta-Actin mRNA levels.

### **Chromatin immunoprecipitation**

ChIP experiments were performed as previously described (9). Briefly, approximately  $2 \times 10^8$  LM2 cells per condition were crosslinked with 1% formaldehyde. Cells were harvested, lysed and chromatin was fragmented by sonication in a Bioruptor (Diagenode), in a 30 min cycle of 30s ON, 30s OFF at 4 °C and maximum level. In parallel, 100 µl of magnetic beads (Dynabeads, Invitrogen) were prepared by washing 3x with 0.5% BSA in PBS and incubated

o/n with 20 µg Fra-1 antibody (N-17, sc183x, Santa Cruz) or 20 µg rabbit IgG as a control. 50 µl of lysate was kept as whole cell extract and the remainder was added to the antibody/magnetic bead mix and incubated o/n. Afterwards beads were washed 12x with RIPA buffer and finally once more with TBS. Samples were eluted from the beads and reverse-crosslinking was performed at 65 °C for 6 h.

DNA was extracted via phenol-chloroform-isoamylalcohol phases separated with 2.0 ml Phase Lock Gel Light tubes (5Prime) according to the manufacturers protocol. DNA was pelleted, washed and dissolved in TE buffer.

Real-time PCR primer sets (Supplementary Table 3) were designed based on bioinformatic data from publicly available ChIP-seq datasets (genome.ucsc.edu\ENCODE). Binding peaks for c-Fos and/or Jun, which were considered putative Fra-1 binding sites, were identified in the *ADORA2B* gene on multiple places and 5 were chosen due to conservation over a range of cell types (Fig. S12C). Negative control primer sets were designed for 2 random regions that did not show a binding peak. Real-time PCR was performed on a StepOne Plus with standard SYBR Green mix (Life Technologies). Data was normalized to primer efficiency and negative control 1.

### **Quantification of pulmonary metastasis**

Mice were sacrificed using CO<sub>2</sub> asphyxiation and the lungs were subsequently removed and dissected. Lungs were fixed in an Ethanol/Acetic acid/Formol saline fixative (EAF) and examined under a stereoscope. Macroscopic pulmonary metastases were identified as aberrant white masses on the surface of the lungs. For histological assessment of metastases, 8 sections from independent positions in the lungs were stained with hematoxylin-eosin (H&E) and the total number of metastases in these sections was determined. Alternatively, lungs were fixed in formaldehyde and imaged within 2 hours by fluorescence microscopy for quantification of

the fluorescence emitted by GFP-labeled LM2 cells. Images were taken with the same intensities and exposure times, and the mean fluorescence intensity per surface area occupied by tumor cells was quantified using ImageJ software (<http://rsb.info.nih.gov/ij/download.html>) with the MBF plug-in bundle (<http://www.macbiophotonics.ca/downloads.htm>).

### **Retro- and lentiviral transduction**

Retroviral transductions were performed as described ([http://www.stanford.edu/group/nolan/retroviral\\_systems/phx.html](http://www.stanford.edu/group/nolan/retroviral_systems/phx.html)). RIE-1 and RK3E cells were retrovirally transduced with murine TrkB and BDNF expression constructs as previously described (10), except that the TrkB cDNA was subcloned into pMSCV-blasticidin. Retroviral silencing of Fra-1 in RK3E cells was performed using the pRS-puro vector with the following targeting sequences: *sh-Fra-1(1)* (TAACTAGCCTAGAACACTA) and *sh-Fra-1(2)* (GAAGTTCCACCTTGTGCCA). As negative control, pRS-puro without insert was used. Lentiviral transductions were performed as described previously (11). Luciferase was subcloned into lentiviral vector HIV-CS-CG. Silencing of Fra-1 in LM2 and MDA-MB-231 cells was performed using the following targeting sequences: *sh-Fra-1(1)* (GTAGATCCTTAGAGGTCCT) and *sh-Fra-1(2)* (GGCCTGTGCTTGAACCTGA). As negative control, vector without insert was used. Cells were infected once ( $2 \times 10^6$  cells with  $1.5 \times 10^7$  viral particles) and GFP-positive cells were selected by fluorescence activated cell sorting (FACS). Silencing of ADORA2B in LM2 cells was performed using pLKO.1 vectors from the TRC library (Sigma). *sh-ADORA2B(1)*: TRCN0000065334, *sh-ADORA2B(2)*: TRCN0000065335, *sh-ADORA2B(3)*: TRCN0000065336 and *sh-ADORA2B(4)*: TRCN0000065337. As a negative control, vector without insert was used. Cells were infected once and then selected for puromycin resistance.

Desmet et al.  
Supplementary information

TRCN0000065337. As a negative control, vector without insert was used. Cells were infected once and then selected for puromycin resistance.

**Supplementary Table 1: Fra1 classifier**

| Affymetrix Probe ID | Entrez ID | HGNC Symbol | Poor Prognostic Centroid | Good Prognostic Centroid | Gene Description                                                                                       |
|---------------------|-----------|-------------|--------------------------|--------------------------|--------------------------------------------------------------------------------------------------------|
| 200034_s_at         | 6128      | RPL6        | -0.08                    | 0.03                     | ribosomal protein L6 /// ribosomal protein L6                                                          |
| 200620_at           | 9528      | TMEM59      | -0.14                    | 0.03                     | transmembrane protein 59                                                                               |
| 200640_at           | 7534      | YWHAZ       | 0.14                     | -0.08                    | tyrosine 3-monooxygenase/tryptophan 5-monooxygenase activation protein, zeta polypeptide               |
| 200690_at           | 3313      | HSPA9B      | 0.04                     | -0.09                    | heat shock 70kDa protein 9B (mortalin-2)                                                               |
| 200756_x_at         | 813       | CALU        | 0.19                     | -0.02                    | calumenin                                                                                              |
| 200760_s_at         | 10550     | ARL6IP5     | -0.19                    | 0.06                     | ADP-ribosylation-like factor 6 interacting protein 5                                                   |
| 200761_s_at         | 10550     | ARL6IP5     | -0.18                    | 0.06                     | ADP-ribosylation-like factor 6 interacting protein 5                                                   |
| 200827_at           | 5351      | PLOD1       | 0.14                     | -0.08                    | procollagen-lysine 1, 2-oxoglutarate 5-dioxygenase 1                                                   |
| 200921_s_at         | 694       | BTG1        | -0.17                    | 0.02                     | B-cell translocation gene 1, anti-proliferative proteasome (prosome, macropain) subunit, alpha type, 7 |
| 201114_x_at         | 5688      | PSMA7       | 0.20                     | -0.04                    | major histocompatibility complex, class II, DP beta 1                                                  |
| 201137_s_at         | 3115      | HLA-DPB1    | -0.30                    | 0.04                     | ribosomal protein L4                                                                                   |
| 201154_x_at         | 6124      | RPL4        | -0.05                    | 0.00                     | ATPase, H+ transporting, lysosomal 9kDa, V0 subunit e                                                  |
| 201172_x_at         | 8992      | ATP6V0E     | 0.05                     | -0.03                    | solute carrier family 7 (cationic amino acid transporter, y+ system), member 5                         |
| 201195_s_at         | 8140      | SLC7A5      | 0.43                     | -0.10                    | ATPase, Na+/K+ transporting, beta 1 polypeptide                                                        |
| 201242_s_at         | 481       | ATP1B1      | -0.19                    | -0.03                    | solute carrier family 2 (facilitated glucose transporter), member 1                                    |
| 201249_at           | 6513      | SLC2A1      | 0.03                     | -0.06                    | ribosomal protein S6                                                                                   |
| 201254_x_at         | 6194      | RPS6        | -0.08                    | 0.03                     | coatamer protein complex, subunit beta                                                                 |
| 201359_at           | 1315      | COPB        | 0.00                     | -0.06                    | annexin A7                                                                                             |
| 201366_at           | 310       | ANXA7       | -0.08                    | -0.05                    | transforming growth factor, beta-induced, 68kDa                                                        |
| 201506_at           | 7045      | TGFBI       | 0.21                     | -0.08                    | myristoylated alanine-rich protein kinase C substrate                                                  |
| 201668_x_at         | 4082      | MARCKS      | 0.11                     | -0.16                    | SH3-domain GRB2-like 1                                                                                 |
| 201851_at           | 6455      | SH3GL1      | 0.01                     | -0.06                    | zinc finger RNA binding protein                                                                        |
| 201857_at           | 51663     | ZFR         | 0.05                     | -0.02                    | ubiquitin-conjugating enzyme E2A (RAD6 homolog)                                                        |
| 201899_s_at         | 7319      | UBE2A       | 0.05                     | -0.06                    | dishevelled, dsh homolog 3 (Drosophila)                                                                |
| 201908_at           | 1857      | DVL3        | -0.03                    | -0.18                    | Hypothetical protein PRO2730                                                                           |
| 201934_at           | 80335     | PRO2730     | -0.14                    | -0.05                    | CDK2-associated protein 1                                                                              |
| 201938_at           | 8099      | CDK2AP1     | 0.11                     | -0.08                    | kinesin family member 5B                                                                               |
| 201991_s_at         | 3799      | KIF5B       | 0.13                     | -0.06                    | succinate dehydrogenase complex, subunit D, integral membrane protein                                  |
| 202026_at           | 6392      | SDHD        | 0.00                     | 0.05                     | solute carrier family 39 (zinc transporter), member 6                                                  |
| 202088_at           | 25800     | SLC39A6     | -0.30                    | 0.11                     | baculoviral IAP repeat-containing 5 (survivin)                                                         |
| 202094_at           | 332       | BIRC5       | 0.23                     | -0.06                    | MCM2 minichromosome maintenance deficient 2, mitotin (S. cerevisiae)                                   |
| 202107_s_at         | 4171      | MCM2        | 0.16                     | -0.05                    | nucleoporin 62kDa                                                                                      |
| 202153_s_at         | 23636     | NUP62       | 0.04                     | -0.08                    | integral membrane protein 1                                                                            |
| 202223_at           | 3703      | ITM1        | -0.08                    | 0.02                     | v-myc myelocytomatosis viral oncogene homolog (avian)                                                  |
| 202431_s_at         | 4609      | MYC         | 0.03                     | -0.05                    | cysteine rich transmembrane BMP regulator 1 (chordin-like)                                             |
| 202551_s_at         | 51232     | CRIM1       | -0.33                    | -0.02                    | cysteine rich transmembrane BMP regulator 1 (chordin-like)                                             |
| 202552_s_at         | 51232     | CRIM1       | -0.16                    | 0.06                     |                                                                                                        |



Desmet et al.  
Supplementary information

|             |        |          |       |       |                                                                                                                                 |
|-------------|--------|----------|-------|-------|---------------------------------------------------------------------------------------------------------------------------------|
| 202594_at   | 23484  | LEPROTL1 | -0.06 | 0.01  | leptin receptor overlapping transcript-like 1                                                                                   |
| 202627_s_at | 5054   | SERPINE1 | 0.23  | -0.05 | serine (or cysteine) proteinase inhibitor, clade E (nexin, plasminogen activator inhibitor type 1), member 1                    |
| 202628_s_at | 5054   | SERPINE1 | 0.19  | -0.09 | serine (or cysteine) proteinase inhibitor, clade E (nexin, plasminogen activator inhibitor type 1), member 1                    |
| 202733_at   | 8974   | P4HA2    | 0.13  | -0.15 | procollagen-proline, 2-oxoglutarate 4-dioxygenase (proline 4-hydroxylase), alpha polypeptide II                                 |
| 202806_at   | 1627   | DBN1     | 0.12  | -0.08 | drebrin 1                                                                                                                       |
| 202808_at   | 54838  | C10orf26 | -0.15 | 0.00  | chromosome 10 open reading frame 26                                                                                             |
| 202833_s_at | 5265   | SERPINA1 | -0.26 | 0.25  | serine (or cysteine) proteinase inhibitor, clade A (alpha-1 antiproteinase, antitrypsin), member 1                              |
| 202998_s_at | 4017   | LOXL2    | 0.23  | -0.08 | lysyl oxidase-like 2                                                                                                            |
| 203045_at   | 4814   | NINJ1    | -0.19 | -0.02 | ninjurin 1                                                                                                                      |
| 203358_s_at | 2146   | EZH2     | 0.31  | 0.00  | enhancer of zeste homolog 2 (Drosophila)                                                                                        |
| 203418_at   | 890    | CCNA2    | 0.40  | 0.05  | cyclin A2                                                                                                                       |
| 203590_at   | 1783   | DNCL12   | 0.01  | -0.11 | dynein, cytoplasmic, light intermediate polypeptide 2                                                                           |
| 203719_at   | 2067   | ERCC1    | -0.15 | 0.00  | excision repair cross-complementing rodent repair deficiency, complementation group 1 (includes overlapping antisense sequence) |
| 203932_at   | 3109   | HLA-DMB  | -0.07 | 0.07  | major histocompatibility complex, class II, DM beta                                                                             |
| 204033_at   | 9319   | TRIP13   | 0.36  | -0.09 | beta                                                                                                                            |
| 204066_s_at | 116987 | CENTG2   | -0.21 | -0.14 | thyroid hormone receptor interactor 13                                                                                          |
| 204264_at   | 1376   | CPT2     | -0.04 | 0.03  | centaurin, gamma 2                                                                                                              |
| 204351_at   | 6286   | S100P    | 0.52  | -0.14 | carnitine palmitoyltransferase II                                                                                               |
| 204455_at   | 667    | DST      | 0.07  | 0.52  | S100 calcium binding protein P                                                                                                  |
| 204475_at   | 4312   | MMP1     | 1.32  | 0.42  | dystonin                                                                                                                        |
| 204540_at   | 1917   | EEF1A2   | 0.57  | 0.42  | matrix metalloproteinase 1 (interstitial collagenase)                                                                           |
| 204589_at   | 9891   | NUAK1    | 0.08  | -0.05 | eukaryotic translation elongation factor 1 alpha 2                                                                              |
| 204627_s_at | 3690   | ITGB3    | 0.01  | 0.02  | NUAK family, SNF1-like kinase, 1                                                                                                |
| 204658_at   | 29896  | TRA2A    | -0.17 | -0.07 | integrin, beta 3 (platelet glycoprotein IIIa, antigen CD61)                                                                     |
| 204916_at   | 10267  | RAMP1    | 0.21  | 0.13  | transformer-2 alpha                                                                                                             |
| 205199_at   | 768    | CA9      | 0.17  | -0.02 | receptor (calcitonin) activity modifying protein 1                                                                              |
| 205200_at   | 7123   | CLEC3B   | -0.24 | 0.20  | carbonic anhydrase IX                                                                                                           |
| 205280_at   | 2743   | GLRB     | -0.04 | 0.27  | C-type lectin domain family 3, member B                                                                                         |
| 205479_s_at | 5328   | PLAU     | 0.18  | -0.17 | glycine receptor, beta                                                                                                          |
| 205483_s_at | 9636   | G1P2     | 0.41  | -0.09 | plasminogen activator, urokinase                                                                                                |
| 205542_at   | 26872  | STEAP1   | -0.14 | 0.16  | interferon, alpha-inducible protein (clone IFI-15K)                                                                             |
| 205574_x_at | 649    | BMP1     | 0.13  | -0.08 | six transmembrane epithelial antigen of the prostate 1                                                                          |
| 205817_at   | 6495   | SIX1     | 0.25  | 0.09  | bone morphogenetic protein 1                                                                                                    |
| 205926_at   | 9466   | IL27RA   | -0.06 | 0.07  | sine oculis homeobox homolog 1 (Drosophila)                                                                                     |
| 206022_at   | 4693   | NDP      | 0.29  | 0.38  | interleukin 27 receptor, alpha                                                                                                  |
| 206100_at   | 1368   | CPM      | 0.08  | 0.19  | Norrie disease (pseudoglioma)                                                                                                   |
| 206224_at   | 1469   | CST1     | -0.04 | 0.34  | carboxypeptidase M                                                                                                              |
| 206273_at   | 10650  | C18orf43 | 0.03  | -0.04 | cystatin SN                                                                                                                     |
| 207069_s_at | 4091   | SMAD6    | 0.02  | -0.05 | chromosome 18 open reading frame 43                                                                                             |
| 207604_s_at | 9497   | SLC4A7   | -0.18 | 0.13  | SMAD, mothers against DPP homolog 6 (Drosophila)                                                                                |
|             |        |          |       |       | solute carrier family 4, sodium bicarbonate cotransporter, member 7                                                             |

Desmet et al.  
Supplementary information

|             |       |          |       |       |                                                                                                                                                         |
|-------------|-------|----------|-------|-------|---------------------------------------------------------------------------------------------------------------------------------------------------------|
| 207722_s_at | 55643 | BTBD2    | -0.12 | 0.02  | BTB (POZ) domain containing 2                                                                                                                           |
| 207740_s_at | 23636 | NUP62    | 0.01  | -0.06 | nucleoporin 62kDa                                                                                                                                       |
| 207842_s_at | 22794 | CASC3    | 0.00  | 0.03  | cancer susceptibility candidate 3                                                                                                                       |
| 208029_s_at | 55353 | LAPTM4B  | 0.29  | -0.03 | lysosomal associated protein transmembrane 4 beta<br>/// lysosomal associated protein transmembrane 4<br>beta                                           |
| 208405_s_at | 8763  | CD164    | -0.09 | -0.04 | CD164 antigen, sialomucin                                                                                                                               |
| 208424_s_at | 57019 | CIAPIN1  | 0.17  | -0.04 | cytokine induced apoptosis inhibitor 1                                                                                                                  |
| 208615_s_at | 8073  | PTP4A2   | -0.21 | 0.01  | protein tyrosine phosphatase type IVA, member 2                                                                                                         |
| 208616_s_at | 8073  | PTP4A2   | -0.05 | 0.06  | protein tyrosine phosphatase type IVA, member 2                                                                                                         |
| 208636_at   | 87    | ACTN1    | 0.07  | -0.10 | Actinin, alpha 1<br>X-ray repair complementing defective repair in<br>Chinese hamster cells 5 (double-strand-break<br>rejoining; Ku autoantigen, 80kDa) |
| 208643_s_at | 7520  | XRCC5    | -0.08 | -0.03 | CD164 antigen, sialomucin                                                                                                                               |
| 208654_s_at | 8763  | CD164    | -0.09 | -0.02 | eukaryotic translation initiation factor 2, subunit 2<br>beta, 38kDa                                                                                    |
| 208726_s_at | 8894  | EIF2S2   | 0.14  | -0.04 | lysosomal associated protein transmembrane 4 beta                                                                                                       |
| 208767_s_at | 55353 | LAPTM4B  | 0.27  | 0.00  | ELOVL family member 5, elongation of long chain<br>fatty acids (FEN1/Elo2, SUR4/Elo3-like, yeast)                                                       |
| 208788_at   | 60481 | ELOVL5   | -0.35 | 0.15  | ATPase, Na <sup>+</sup> /K <sup>+</sup> transporting, beta 3 polypeptide<br>beclin 1 (coiled-coil, myosin-like BCL2 interacting<br>protein)             |
| 208836_at   | 483   | ATP1B3   | 0.11  | -0.02 | Kruppel-like factor 6                                                                                                                                   |
| 208945_s_at | 8678  | BECN1    | -0.09 | -0.02 | cytokine induced apoptosis inhibitor 1                                                                                                                  |
| 208961_s_at | 1316  | KLF6     | 0.06  | -0.06 | uncoupling protein 2 (mitochondrial, proton carrier)                                                                                                    |
| 208968_s_at | 57019 | CIAPIN1  | 0.13  | -0.06 | v-fos FBJ murine osteosarcoma viral oncogene<br>homolog                                                                                                 |
| 208998_at   | 7351  | UCP2     | -0.16 | -0.01 | stratifin                                                                                                                                               |
| 209189_at   | 2353  | FOS      | -0.39 | -0.04 | major histocompatibility complex, class II, DR beta 1<br>/// major histocompatibility complex, class II, DR<br>beta 1                                   |
| 209260_at   | 2810  | SFN      | 0.13  | -0.01 | ATP-binding cassette, sub-family C (CFTR/MRP),<br>member 5                                                                                              |
| 209312_x_at | 3123  | HLA-DRB1 | -0.29 | -0.01 | smoothelin                                                                                                                                              |
| 209380_s_at | 10057 | ABCC5    | 0.14  | -0.02 | CD74 antigen (invariant polypeptide of major<br>histocompatibility complex, class II antigen-<br>associated)                                            |
| 209427_at   | 6525  | SMTN     | 0.02  | -0.05 | protein phosphatase 2 (formerly 2A), regulatory<br>subunit B", alpha                                                                                    |
| 209619_at   | 972   | CD74     | -0.35 | -0.04 | pleckstrin homology-like domain, family A, member<br>2                                                                                                  |
| 209632_at   | 5523  | PPP2R3A  | 0.08  | 0.02  | solute carrier family 4, sodium bicarbonate<br>cotransporter, member 7                                                                                  |
| 209803_s_at | 7262  | PHLDA2   | 0.34  | 0.01  | insulin-like growth factor binding protein 3                                                                                                            |
| 209884_s_at | 9497  | SLC4A7   | -0.18 | 0.12  | SEC31-like 1 (S. cerevisiae)                                                                                                                            |
| 210095_s_at | 3486  | IGFBP3   | 0.05  | -0.21 | phosphofructokinase, liver /// phosphofructokinase,<br>liver                                                                                            |
| 210616_s_at | 22872 | SEC31L1  | -0.02 | -0.15 | stearoyl-CoA desaturase (delta-9-desaturase)                                                                                                            |
| 211065_x_at | 5211  | PFKL     | 0.07  | -0.06 | protein tyrosine phosphatase, receptor type, U<br>leucine-rich repeats and immunoglobulin-like<br>domains 1 /// leucine-rich repeats and                |
| 211162_x_at | 6319  | SCD      | 0.15  | 0.10  | immunoglobulin-like domains 1                                                                                                                           |
| 211320_s_at | 10076 | PTPRU    | 0.14  | -0.04 | interferon gamma receptor 1 /// interferon gamma<br>receptor 1                                                                                          |
| 211596_s_at | 26018 | LRIG1    | -0.53 | 0.02  | fibronectin 1 /// fibronectin 1                                                                                                                         |
| 211676_s_at | 3459  | IFNGR1   | -0.01 | 0.00  |                                                                                                                                                         |
| 211719_x_at | 2335  | FN1      | 0.04  | -0.22 |                                                                                                                                                         |

Desmet et al.  
Supplementary information

|             |        |           |       |       |                                                                                                                                   |
|-------------|--------|-----------|-------|-------|-----------------------------------------------------------------------------------------------------------------------------------|
| 211733_x_at | 6342   | SCP2      | -0.14 | -0.03 | sterol carrier protein 2 /// sterol carrier protein 2 ecotropic viral integration site 2B /// ecotropic viral integration site 2B |
| 211742_s_at | 2124   | EVI2B     | 0.00  | 0.13  | integrin alpha 2B                                                                                                                 |
| 211880_x_at | 56114  | PCDHGA1   | 0.03  | -0.02 | protocadherin gamma subfamily A, 1                                                                                                |
| 211937_at   | 1975   | EIF4B     | -0.19 | 0.00  | eukaryotic translation initiation factor 4B                                                                                       |
| 211943_x_at | 7178   | TPT1      | -0.04 | 0.07  | tumor protein, translationally-controlled 1                                                                                       |
| 211963_s_at | 10092  | ARPC5     | 0.13  | -0.06 | actin related protein 2/3 complex, subunit 5, 16kDa                                                                               |
| 211964_at   | 1284   | COL4A2    | -0.03 | -0.22 | collagen, type IV, alpha 2                                                                                                        |
| 211974_x_at | 3516   | RBPSUH    | 0.05  | -0.08 | recombining binding protein suppressor of hairless (Drosophila)                                                                   |
| 211980_at   | 1282   | COL4A1    | 0.01  | -0.21 | collagen, type IV, alpha 1                                                                                                        |
| 211981_at   | 1282   | COL4A1    | 0.05  | -0.14 | collagen, type IV, alpha 1                                                                                                        |
| 211990_at   | 3113   | HLA-DPA1  | -0.34 | -0.03 | major histocompatibility complex, class II, DP alpha 1                                                                            |
| 212002_at   | 26099  | C1orf144  | -0.09 | -0.07 | chromosome 1 open reading frame 144                                                                                               |
| 212081_x_at | 7916   | BAT2      | -0.03 | -0.09 | HLA-B associated transcript 2                                                                                                     |
| 212143_s_at | 3486   | IGFBP3    | 0.07  | -0.15 | insulin-like growth factor binding protein 3                                                                                      |
| 212195_at   | 3572   | IL6ST     | -0.28 | 0.09  | Interleukin 6 signal transducer (gp130, oncostatin M receptor)                                                                    |
| 212250_at   | 92140  | MTDH      | 0.13  | -0.10 | metadherin                                                                                                                        |
| 212251_at   | 92140  | MTDH      | 0.09  | -0.13 | metadherin                                                                                                                        |
| 212265_at   | 9444   | QKI       | 0.07  | -0.08 | quaking homolog, KH domain RNA binding (mouse)                                                                                    |
| 212318_at   | 23534  | TNPO3     | 0.05  | -0.09 | transportin 3                                                                                                                     |
| 212619_at   | 23306  | KIAA0286  | 0.13  | 0.04  | KIAA0286 protein                                                                                                                  |
| 212687_at   | 3987   | LIMS1     | 0.04  | -0.15 | LIM and senescent cell antigen-like domains 1                                                                                     |
| 212869_x_at | 7178   | TPT1      | -0.03 | 0.03  | tumor protein, translationally-controlled 1                                                                                       |
| 212872_s_at | 9477   | TRFP      | 0.07  | -0.02 | Trf (TATA binding protein-related factor)-proximal homolog (Drosophila)                                                           |
| 212911_at   |        |           | -0.15 | 0.03  |                                                                                                                                   |
| 213080_x_at | 6125   | RPL5      | -0.10 | -0.01 | ribosomal protein L5                                                                                                              |
| 213151_s_at | 989    | SEP7      | 0.07  | -0.06 | septin 7                                                                                                                          |
| 213628_at   | 23155  | MCLC      | -0.14 | -0.06 | Mid-1-related chloride channel 1                                                                                                  |
| 213733_at   | 4542   | MYO1F     | -0.10 | -0.01 | myosin IF                                                                                                                         |
| 214150_x_at | 8992   | ATP6V0E   | 0.09  | -0.02 | ATPase, H+ transporting, lysosomal 9kDa, V0 subunit e                                                                             |
| 214201_x_at | 7916   | BAT2      | 0.00  | -0.05 | HLA-B associated transcript 2                                                                                                     |
| 214435_x_at | 5898   | RALA      | 0.14  | -0.21 | v-ral simian leukemia viral oncogene homolog A (ras related)                                                                      |
| 214848_at   | 7534   | YWHAZ     | 0.10  | -0.02 | Tyrosine 3-monooxygenase/tryptophan 5-monooxygenase activation protein, zeta polypeptide                                          |
| 215235_at   | 6709   | SPTAN1    | -0.21 | -0.03 | Spectrin, alpha, non-erythrocytic 1 (alpha-fodrin)                                                                                |
| 215395_x_at | 154754 | TRY6      | -0.01 | -0.01 | trypsinogen C                                                                                                                     |
| 216060_s_at | 23002  | DAAM1     | 0.11  | -0.09 | dishevelled associated activator of morphogenesis 1                                                                               |
| 216384_x_at | 440085 | LOC440085 | -0.03 | -0.12 | similar to prothymosin alpha                                                                                                      |
| 217729_s_at | 166    | AES       | -0.15 | 0.01  | amino-terminal enhancer of split                                                                                                  |
| 217731_s_at | 9445   | ITM2B     | -0.11 | 0.00  | integral membrane protein 2B                                                                                                      |
| 217732_s_at | 9445   | ITM2B     | -0.14 | 0.01  | integral membrane protein 2B                                                                                                      |
| 217767_at   | 718    | C3        | -0.35 | -0.01 | complement component 3                                                                                                            |
| 217838_s_at | 51466  | EVL       | -0.41 | 0.12  | Enah/Vasp-like                                                                                                                    |
| 217849_s_at | 9578   | CDC42BPB  | -0.15 | -0.08 | CDC42 binding protein kinase beta (DMPK-like)                                                                                     |
| 217998_at   | 22822  | PHLDA1    | 0.06  | -0.02 | pleckstrin homology-like domain, family A, member 1                                                                               |
| 218036_x_at | 51068  | NMD3      | 0.16  | -0.05 | NMD3 homolog (S. cerevisiae)                                                                                                      |

Desmet et al.  
Supplementary information

|             |        |           |       |       |                                                                                                                  |
|-------------|--------|-----------|-------|-------|------------------------------------------------------------------------------------------------------------------|
| 218168_s_at | 56997  | CABC1     | -0.01 | 0.06  | chaperone, ABC1 activity of bc1 complex like (S. pombe)                                                          |
| 218173_s_at | 54904  | WHSC1L1   | 0.12  | -0.01 | Wolf-Hirschhorn syndrome candidate 1-like 1                                                                      |
| 218322_s_at | 51703  | ACSL5     | -0.13 | 0.07  | acyl-CoA synthetase long-chain family member 5                                                                   |
| 218589_at   | 10161  | P2RY5     | -0.17 | -0.01 | purinergic receptor P2Y, G-protein coupled, 5                                                                    |
| 218650_at   | 54487  | DGCR8     | -0.08 | -0.02 | DiGeorge syndrome critical region gene 8                                                                         |
| 218693_at   | 23555  | TSPAN15   | -0.08 | 0.10  | tetraspanin 15                                                                                                   |
| 218723_s_at | 28984  | RGC32     | -0.19 | -0.06 | response gene to complement 32                                                                                   |
| 218755_at   | 10112  | KIF20A    | 0.37  | -0.12 | kinesin family member 20A                                                                                        |
| 218758_s_at | 8568   | D21S2056E | 0.03  | -0.06 | DNA segment on chromosome 21 (unique) 2056 expressed sequence                                                    |
| 218795_at   | 51205  | ACP6      | -0.16 | 0.02  | acid phosphatase 6, lysophosphatidic                                                                             |
| 218901_at   | 57088  | PLSCR4    | -0.22 | -0.02 | phospholipid scramblase 4                                                                                        |
| 218915_at   | 4771   | NF2       | -0.11 | -0.04 | neurofibromin 2 (bilateral acoustic neuroma)                                                                     |
| 219427_at   | 79633  | FAT4      | -0.09 | -0.01 | FAT tumor suppressor homolog 4 (Drosophila)                                                                      |
| 220753_s_at | 51084  | CRYL1     | -0.20 | 0.00  | crystallin, lambda 1                                                                                             |
| 221123_x_at | 55893  | ZNF395    | -0.28 | 0.07  | zinc finger protein 395                                                                                          |
| 221272_s_at | 81563  | C1orf21   | -0.15 | 0.09  | chromosome 1 open reading frame 21 ///<br>chromosome 1 open reading frame 21                                     |
| 221485_at   | 9334   | B4GALT5   | 0.13  | -0.10 | UDP-Gal:betaGlcNAc beta 1,4-galactosyltransferase, polypeptide 5                                                 |
| 221741_s_at | 54915  | YTHDF1    | 0.09  | -0.06 | YTH domain family, member 1                                                                                      |
| 221771_s_at | 54737  | HSMPP8    | -0.16 | 0.06  | M-phase phosphoprotein, mpp8                                                                                     |
| 221841_s_at | 9314   | KLF4      | -0.16 | 0.13  | Kruppel-like factor 4 (gut)                                                                                      |
| 222062_at   | 9466   | IL27RA    | -0.08 | 0.13  | interleukin 27 receptor, alpha                                                                                   |
| 222327_x_at | 283491 | OR7E156P  | 0.02  | -0.02 | olfactory receptor, family 7, subfamily E, member 156 pseudogene                                                 |
| 32029_at    | 5170   | PDPK1     | 0.00  | -0.01 | 3-phosphoinositide dependent protein kinase-1                                                                    |
| 33323_r_at  | 2810   | SFN       | 0.09  | -0.15 | stratifin                                                                                                        |
| 40850_at    | 23770  | FKBP8     | -0.08 | 0.02  | FK506 binding protein 8, 38kDa                                                                                   |
| 46665_at    | 54910  | SEMA4C    | -0.02 | -0.09 | sema domain, immunoglobulin domain (Ig), transmembrane domain (TM) and short cytoplasmic domain, (semaphorin) 4C |

List of the microarray probes selected in the Fra1 classifier. The values of the poor and good prognostic centroids are also displayed.

**Supplementary Table 2:** Primers used for RT-PCR experiments

| <b>Gene</b>      | <b>Forward primer sequence (5'-3')</b> | <b>Reverse primer sequence (5'-3')</b> |
|------------------|----------------------------------------|----------------------------------------|
| Rat Fra-1        | GCAGACACAGACAGTCCAG                    | CCATCCACTGCAATTCCTG                    |
| Rat HPRT1        | CTGGTGAAAAGGACCTCTCG                   | TGAAGTGCTCATTATAGTCAAGGGCA             |
| Human ADORA1     | CCGGGTCAAGATCCCTCT                     | AGTCCCACCACGAAGGAGA                    |
| Human ADORA2A    | GGAGGGCTGTCAGGTGAA                     | GTTCTGGCAGCAGCATCAT-                   |
| Human ADORA2B    | TCTGTGTCCCGCTCAGGT                     | GATGCCAAAGGCAAGGAC                     |
| Human ADORA3     | TTCCTTGGCTCTCATTTCAG                   | GTAGTGGGCATTGTAGTTGCAG                 |
| Human beta-Actin | CCAACCGCGAGAAGATGA                     | CCAGAGGCGTACAGGGATAG                   |

Sequences of the primer sets used for RT-PCR experiments

**Supplementary Table 3:** Primers used for ChIP experiments

| <b>Primer set</b>     | <b>Forward primer sequence (5'-3')</b> | <b>Reverse primer sequence (5'-3')</b> |
|-----------------------|----------------------------------------|----------------------------------------|
| Negative<br>Control 1 | GGTCTGCCTTCTACTTTCCAA                  | TGGTATTTAAAAATCCTAACGGTTG              |
| Negative<br>Control 2 | ACATACTCTTTGTA CT CAGAATTTCCA          | TAATGACAGAATAAGGATTGGAACC              |
| Site 1                | ATTTGTGACAGGCCTCATCC                   | CAAACAATTCCAGAGCGAGAG                  |
| Site 2                | CTGCAGAACTGTGAGCCAAA                   | TCACCATTTCCTTTTCAG                     |
| Site 3                | AGCCTGCTTCAGGTTTACCA                   | AATGCAGGAAATGCTGGAAC                   |
| Site 4                | CTGGAGCCACAATCAGTGAG                   | CTCTTGAACCTGTCCC GTGT                  |
| Site 5                | AACGAAGTTTGTGGTTTCAGA                  | TGCCAGTGTATGTGTGTGTGA                  |

Sequences of the primer sets used for ChIP experiments

### Supplementary references

1. Loi S, *et al.* (2007) Definition of clinically distinct molecular subtypes in estrogen receptor-positive breast carcinomas through genomic grade. *J Clin Oncol* 25(10):1239-1246.
2. Miller LD, *et al.* (2005) An expression signature for p53 status in human breast cancer predicts mutation status, transcriptional effects, and patient survival. *Proc Natl Acad Sci USA* 102:13550-13555.
3. Pawitan Y, *et al.* (2005) Gene expression profiling spares early breast cancer patients from adjuvant therapy: derived and validated in two population-based cohorts. *Breast Cancer Res* 7(6):R953 - R964.
4. Desmedt C, *et al.* (2007) Strong Time Dependence of the 76-Gene Prognostic Signature for Node-Negative Breast Cancer Patients in the TRANSBIG Multicenter Independent Validation Series. *Clin Cancer Res* 13(11):3207-3214.
5. Minn AJ, *et al.* (2005) Genes that mediate breast cancer metastasis to lung. *Nature* 436(7050):518-524.
6. Chin K, *et al.* (2006) Genomic and transcriptional aberrations linked to breast cancer pathophysiologies. *Cancer Cell* 10(6):529-541.
7. Legutko A, *et al.* (2011) Sirtuin 1 promotes Th2 responses and airway allergy by repressing peroxisome proliferator-activated receptor- $\gamma$  activity in dendritic cells. *J Immunol* 187(9):4517-4529.
8. Smit MA, Geiger TR, Song JY, Gitelman I, & Peeper DS (2009) A Twist-Snail axis critical for TrkB-induced epithelial-mesenchymal transition-like transformation, anoikis resistance, and metastasis. *Mol Cell Biol* 29(13):3722-3737.

9. Schmidt D, *et al.* (2009) ChIP-seq: using high-throughput sequencing to discover protein-DNA interactions. *Methods* 48(3):240-248.
10. Brummelkamp TR, Bernards R, & Agami R (2002) Stable suppression of tumorigenicity by virus-mediated RNA interference. *Cancer Cell* 2(3):243-247.
11. Ivanova N, *et al.* (2006) Dissecting self-renewal in stem cells with RNA interference. *Nature* 442(7102):533-538.



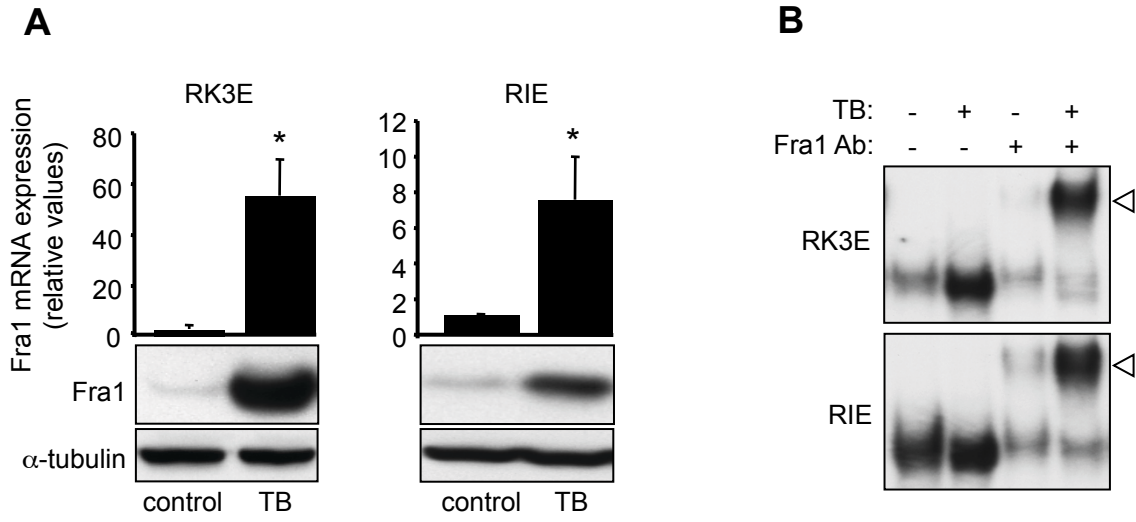

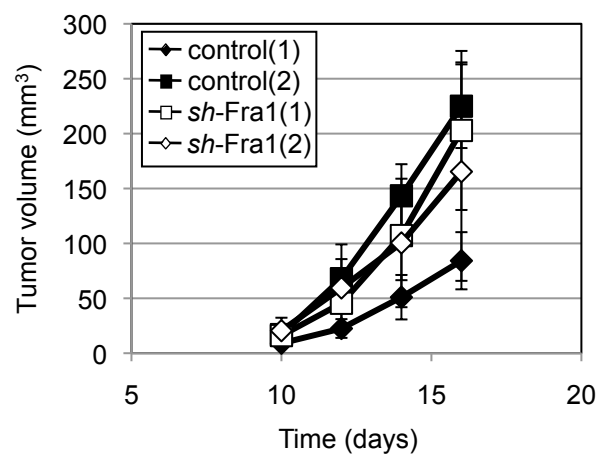

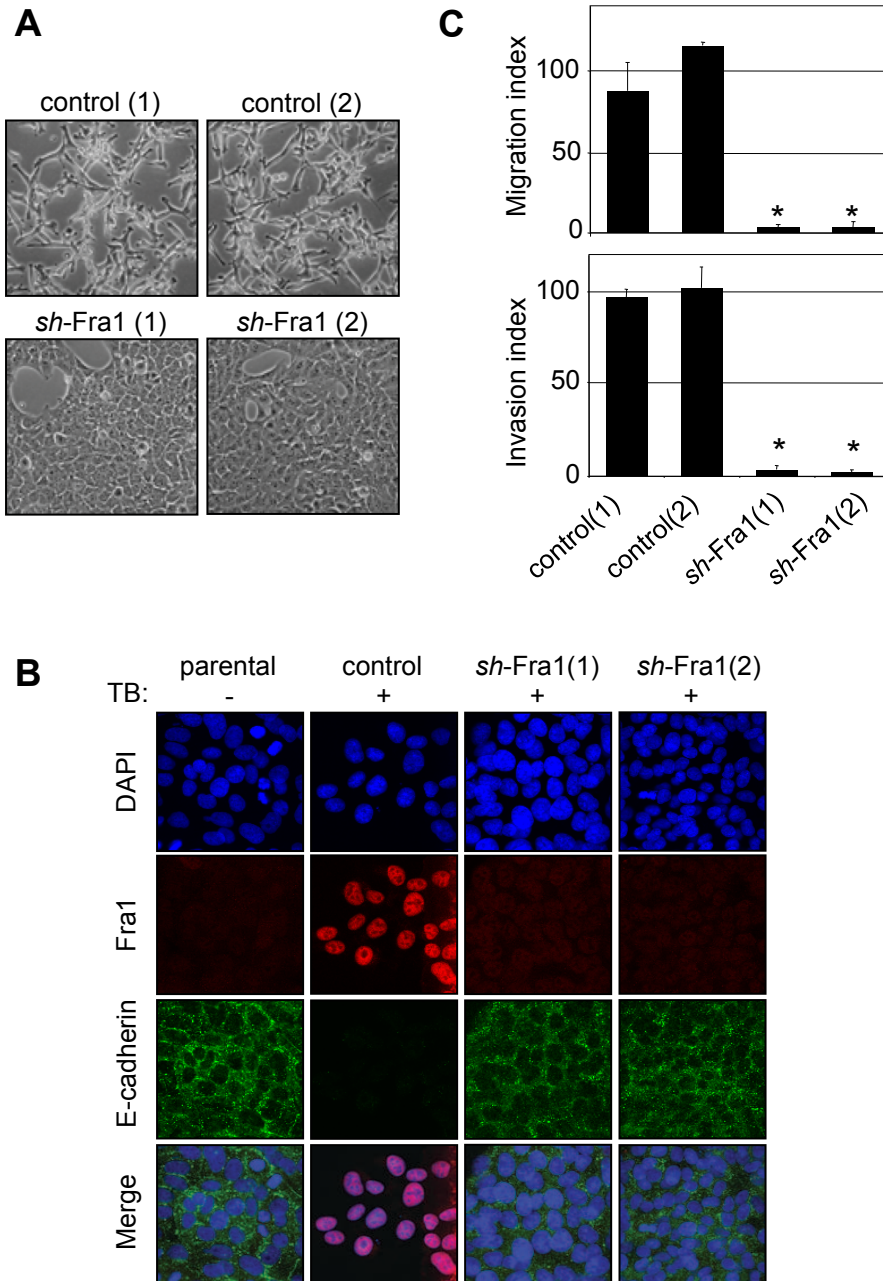

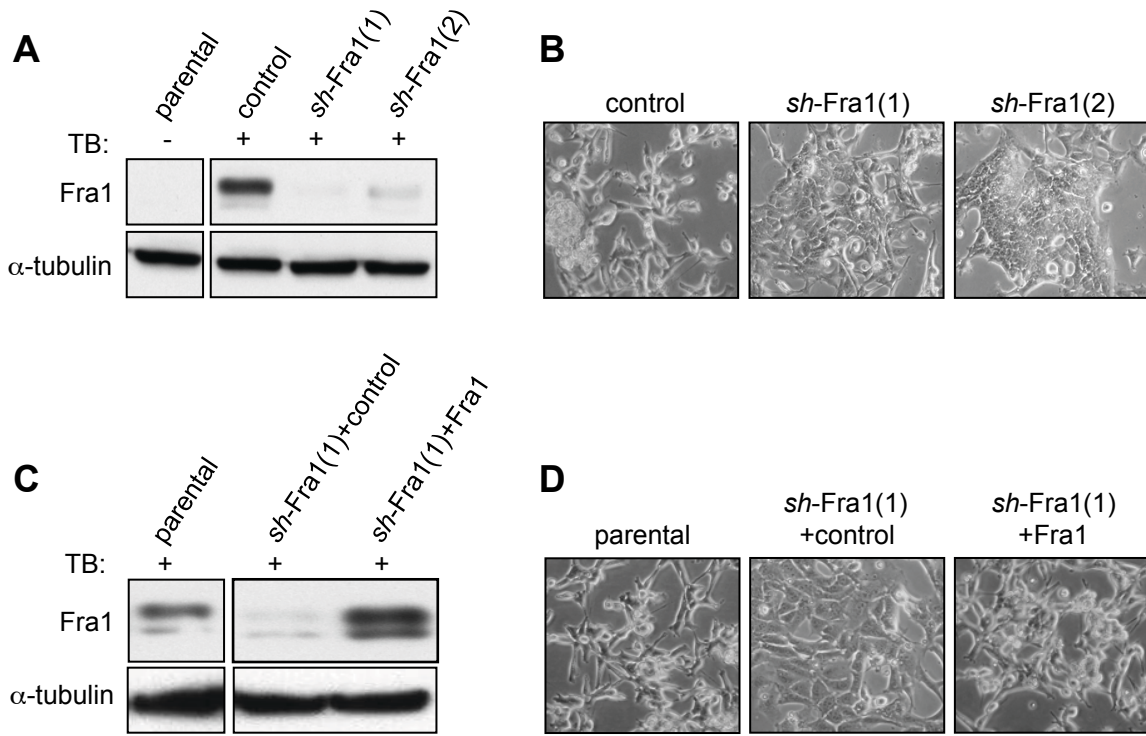

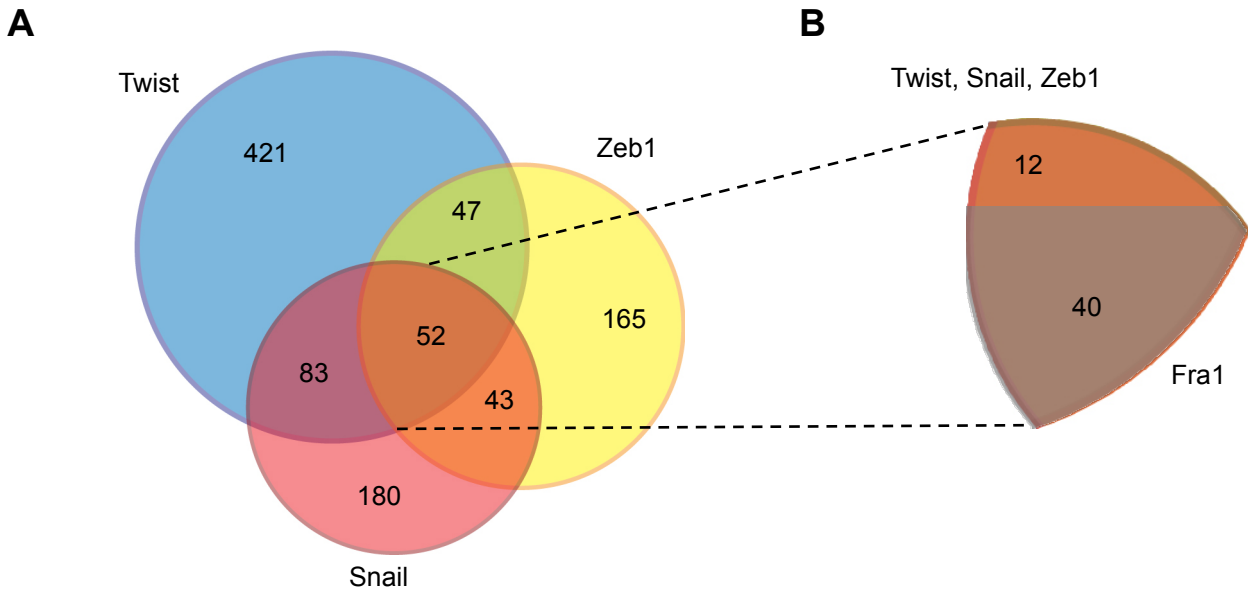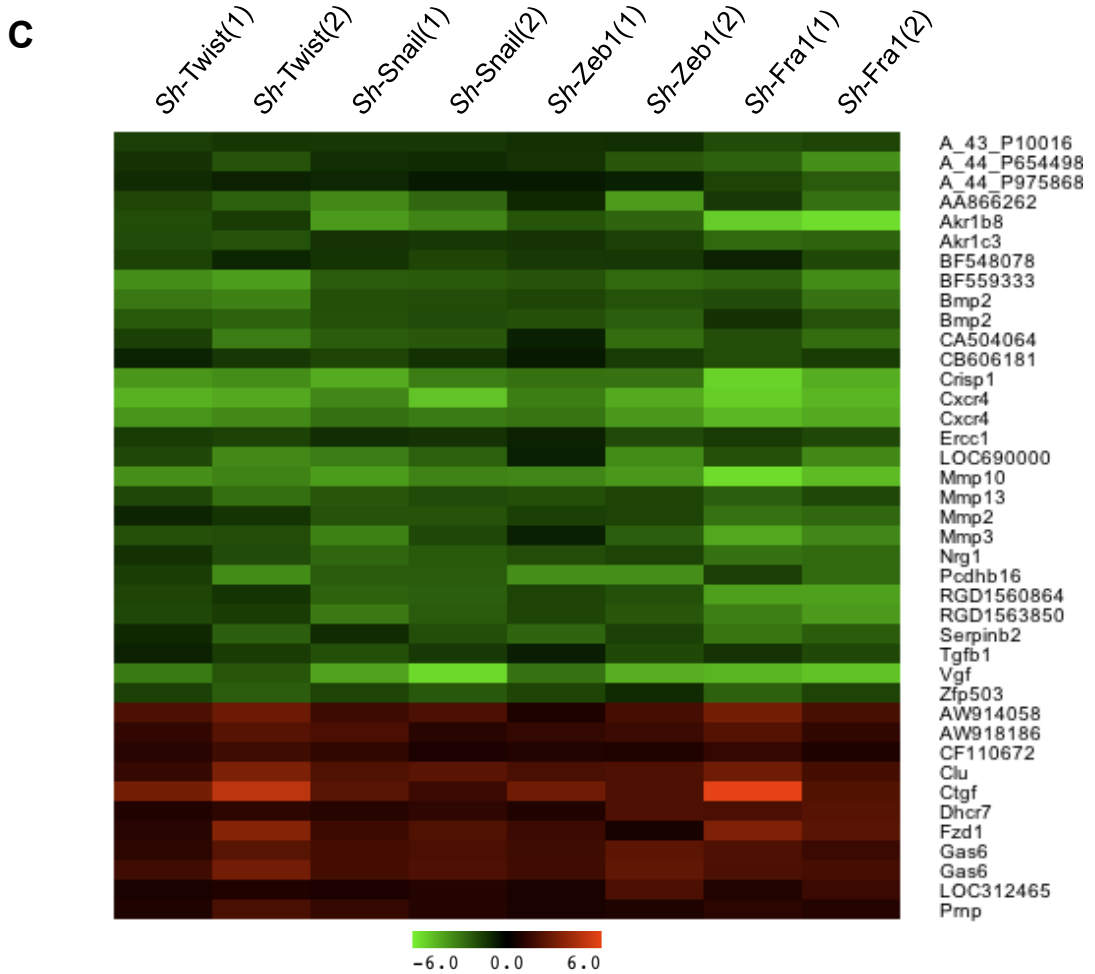

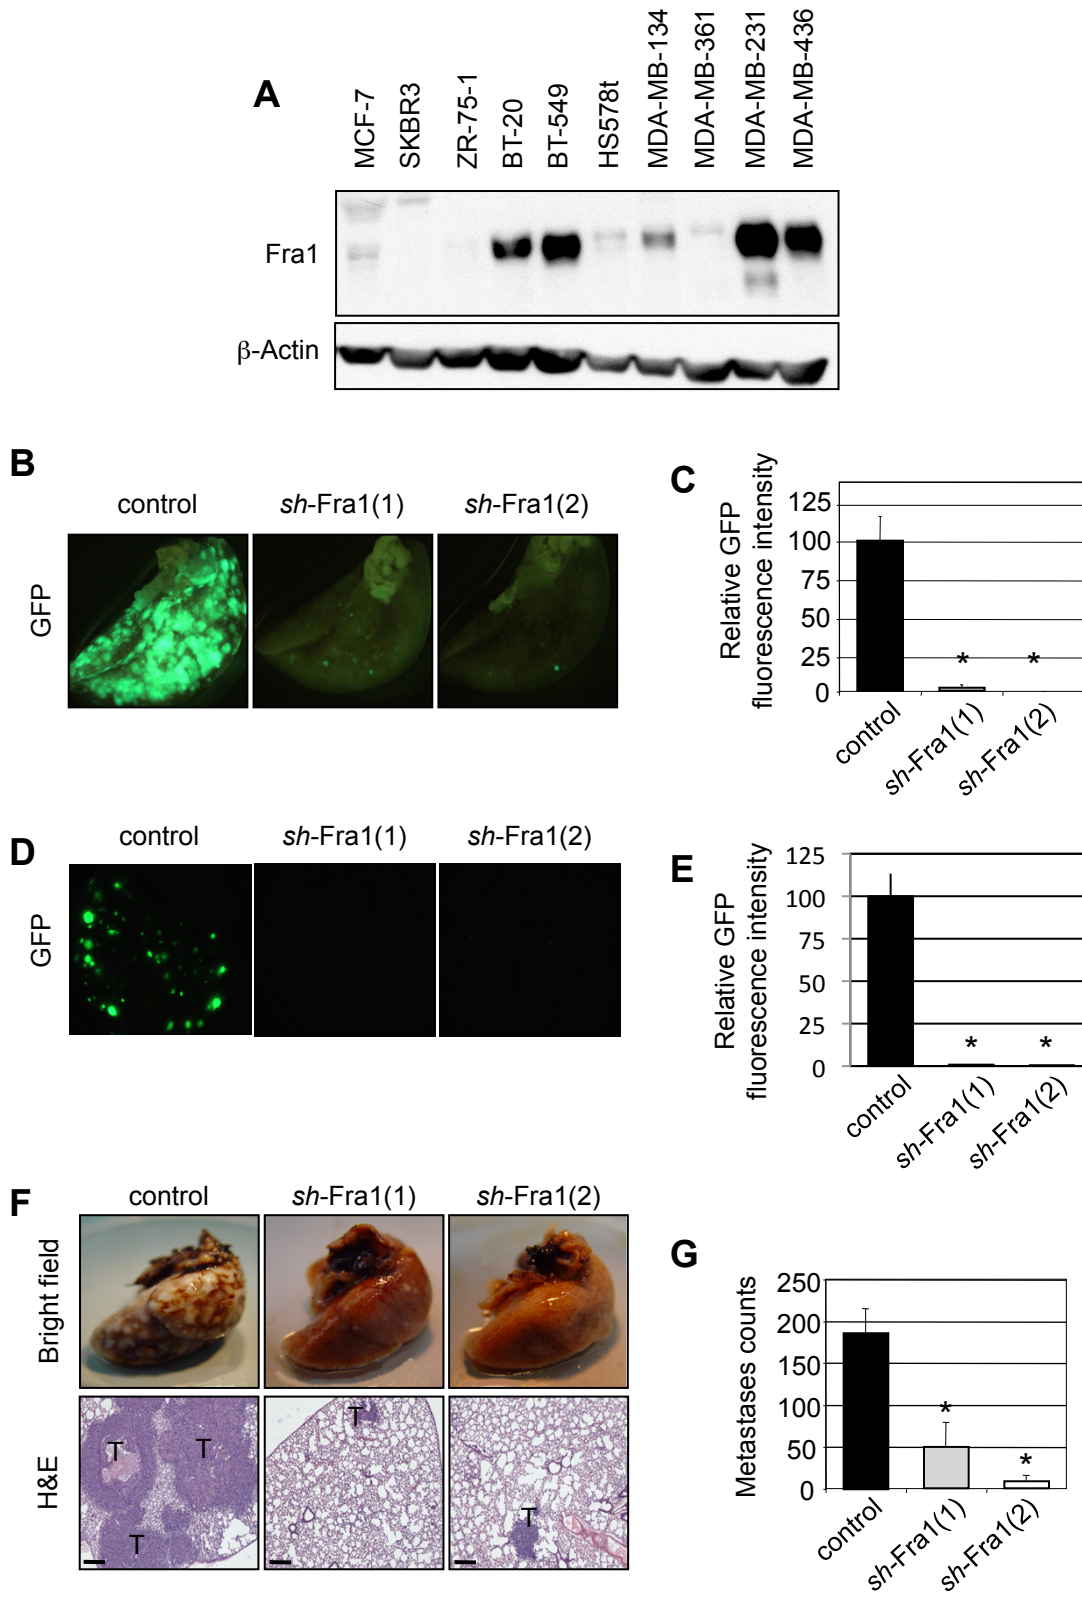

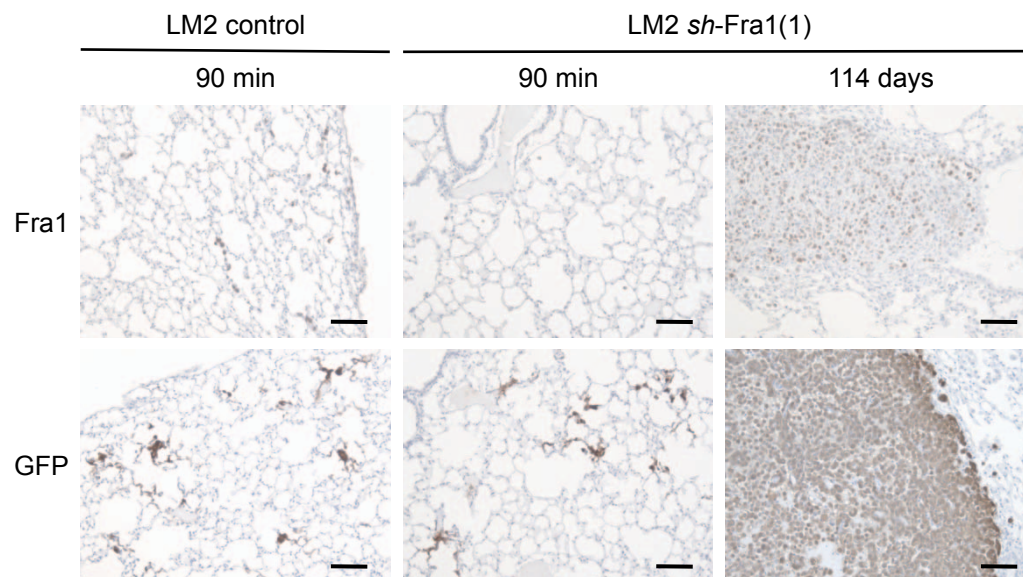

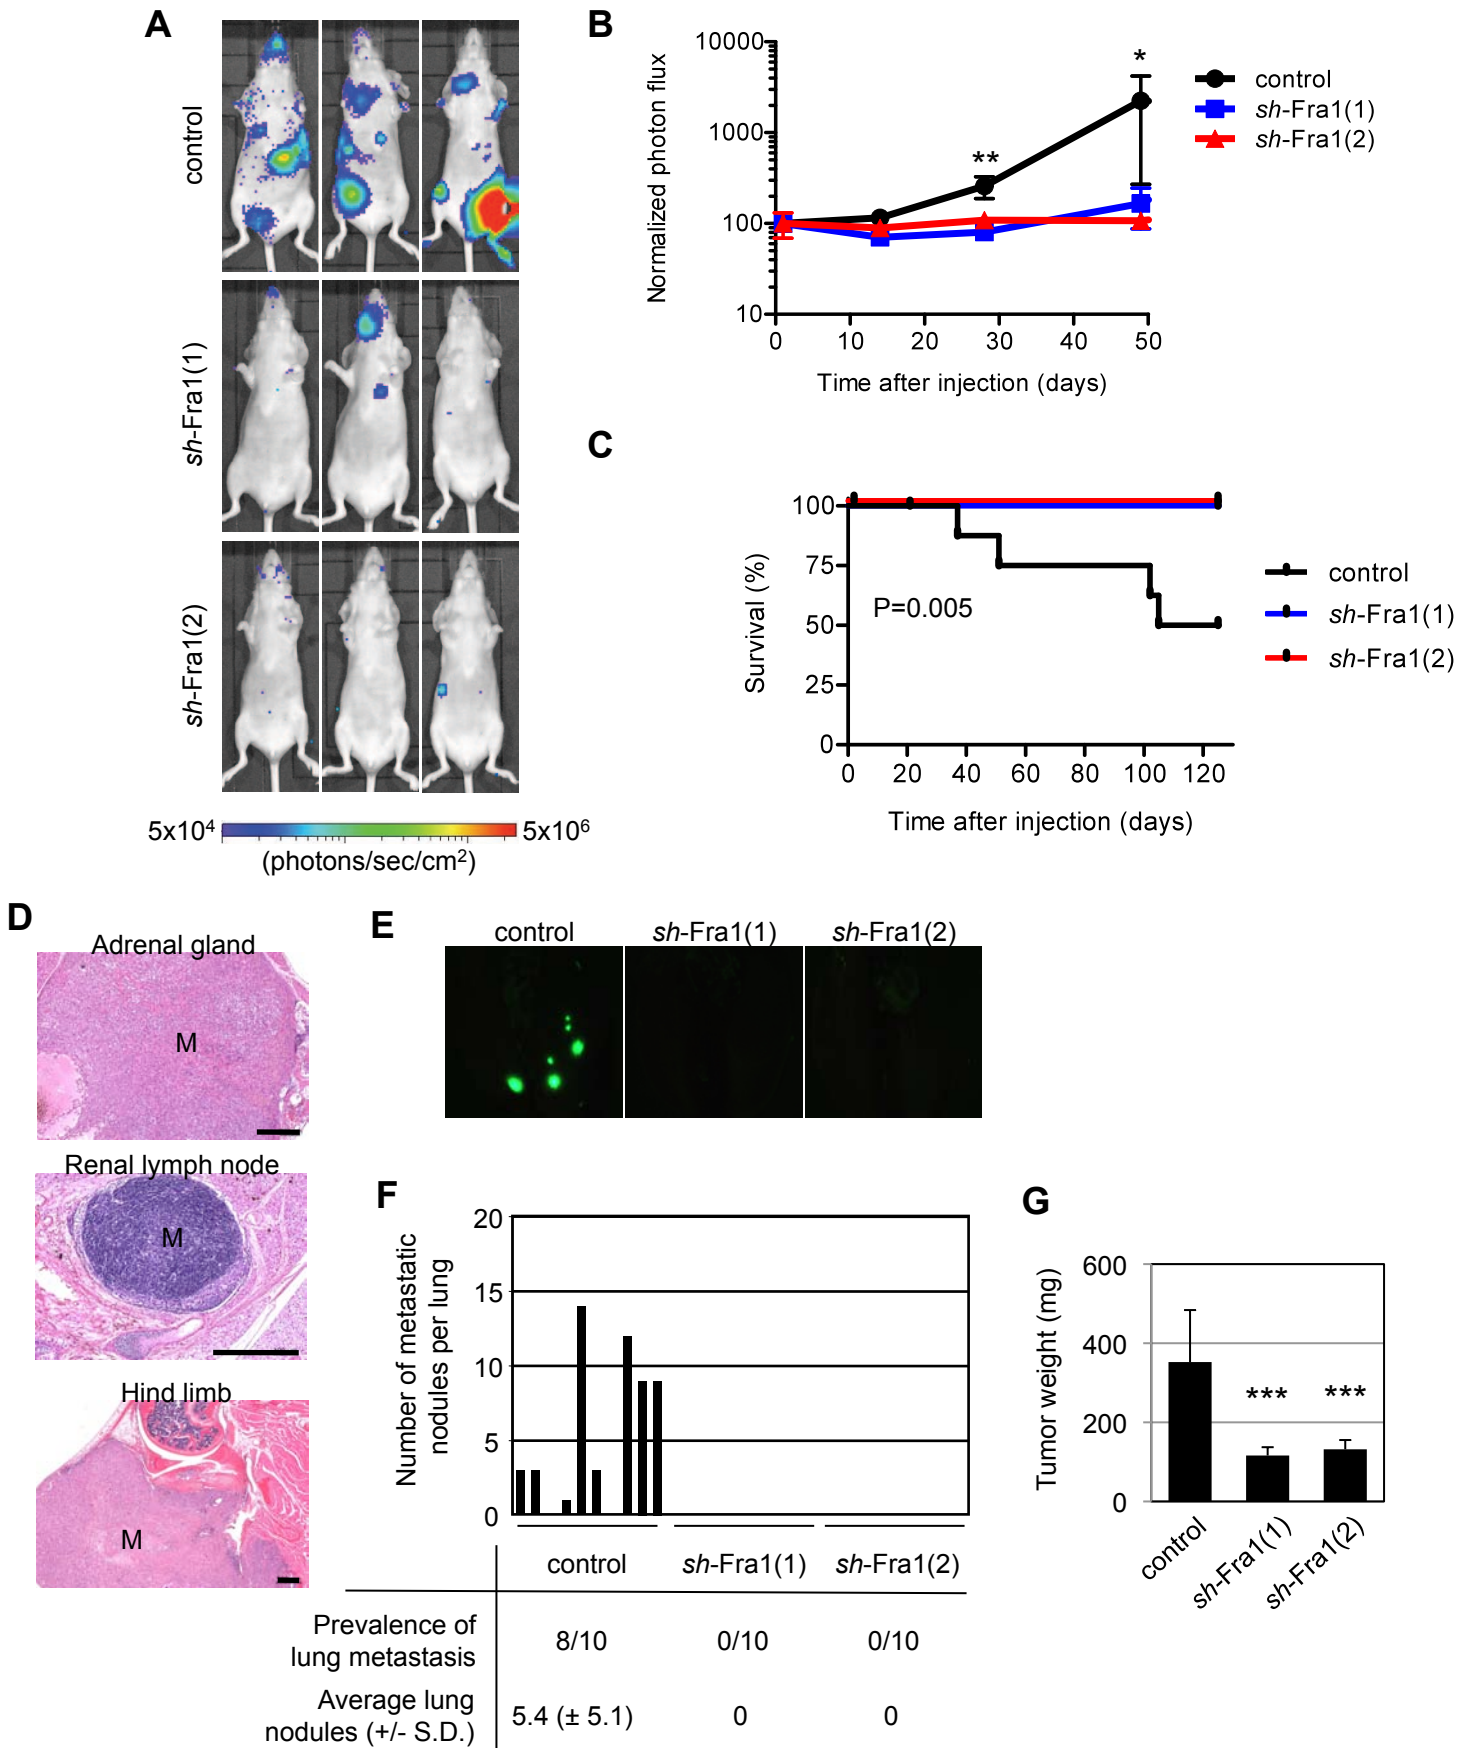



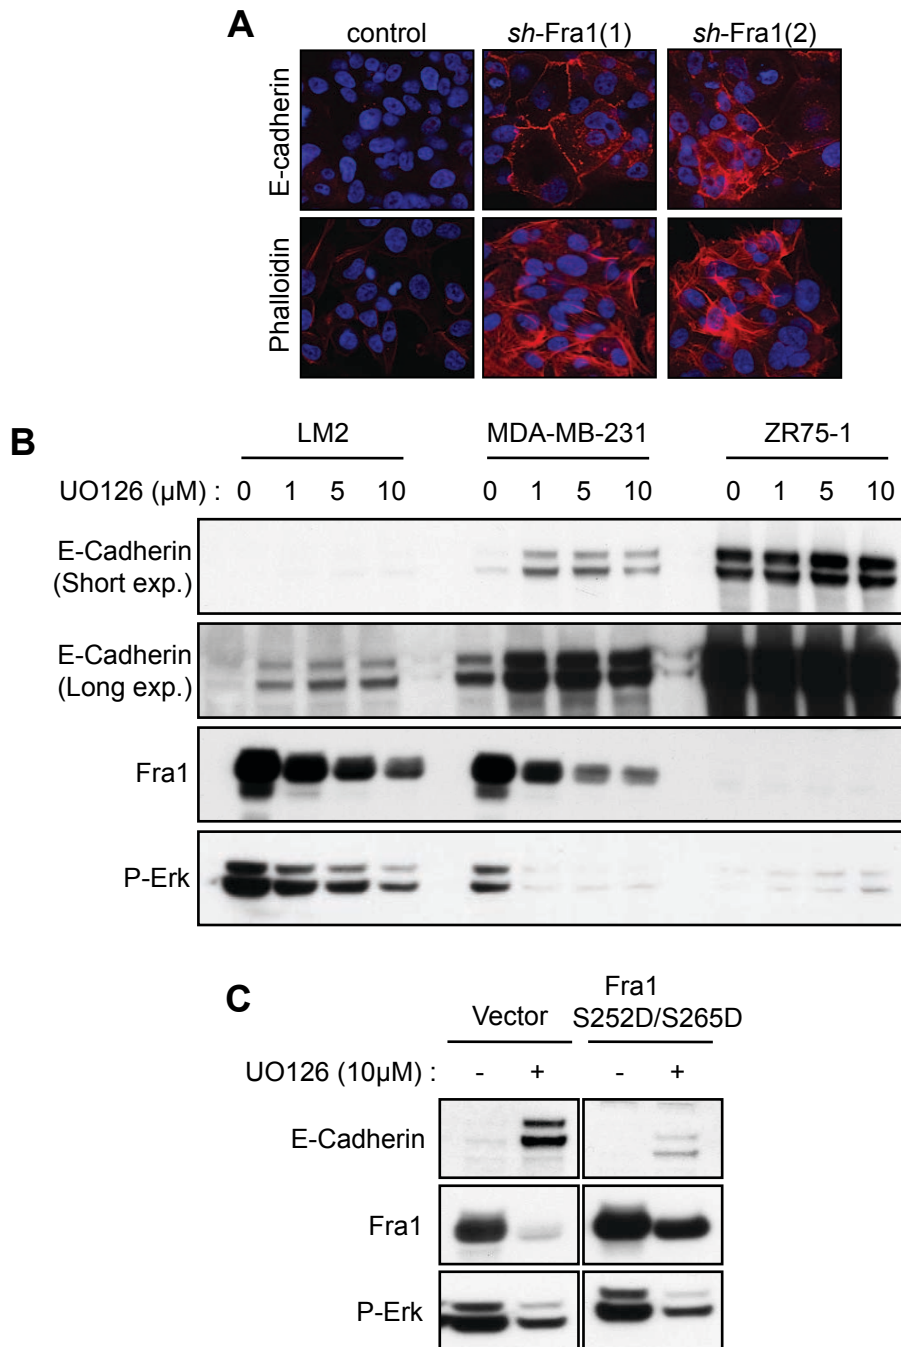

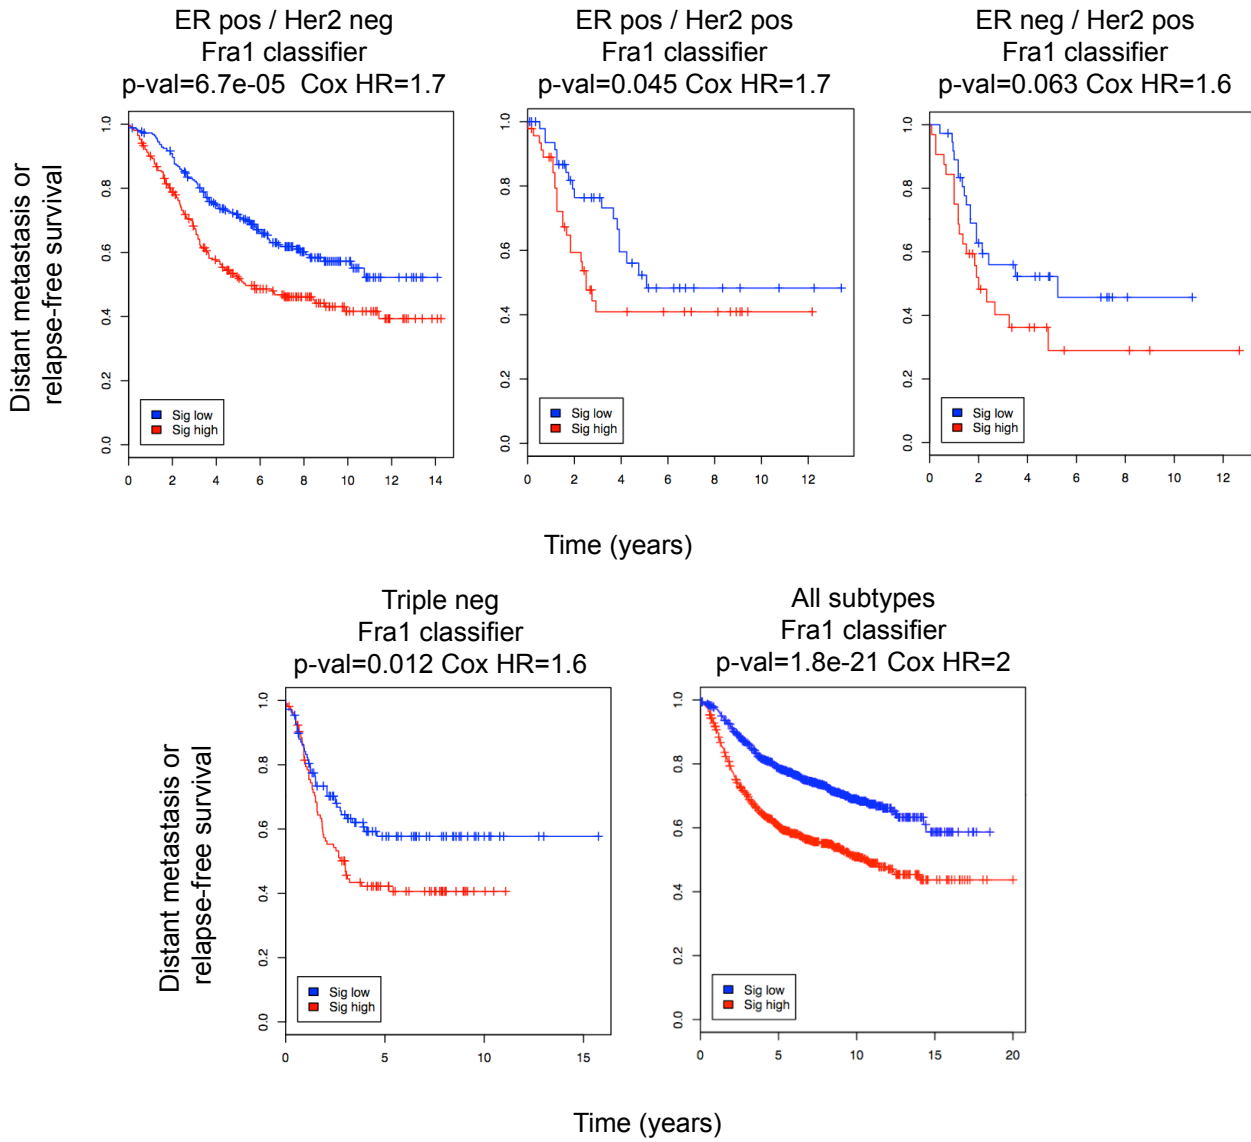

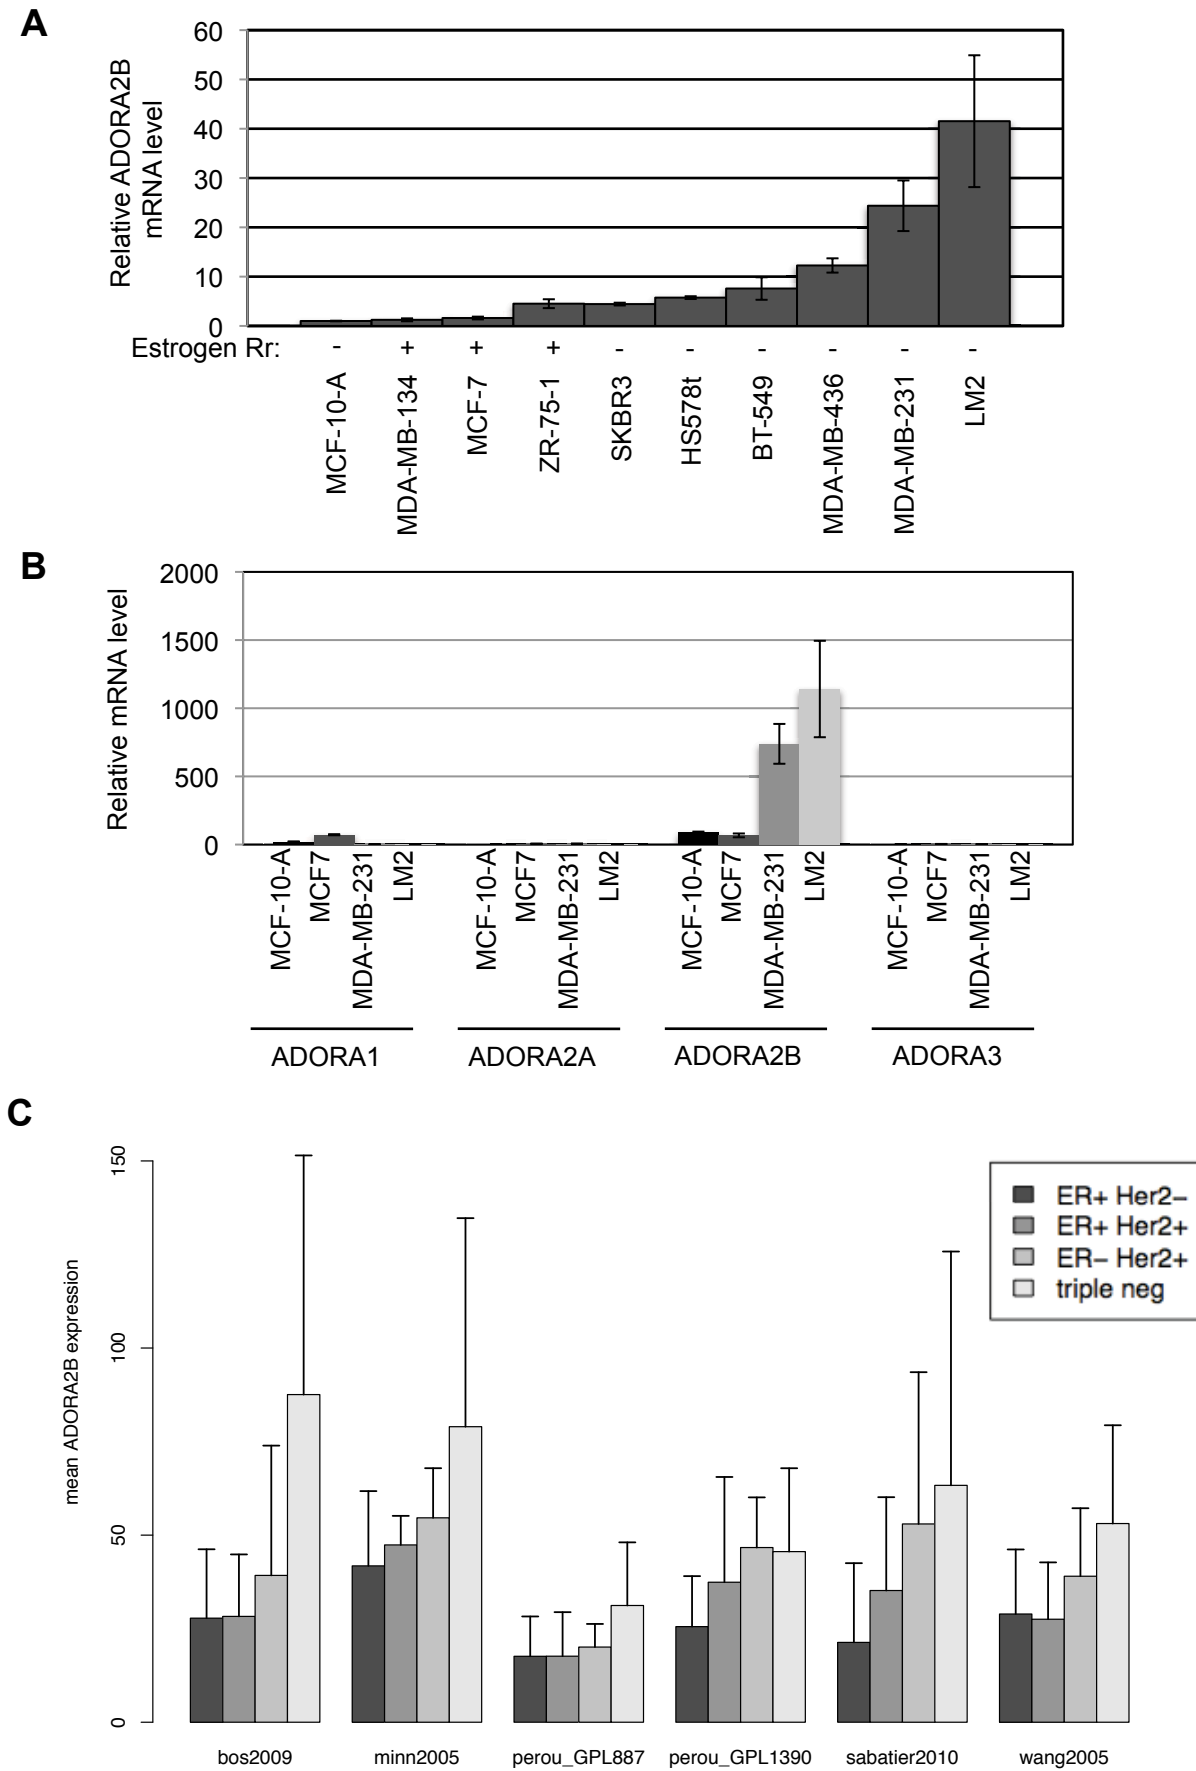

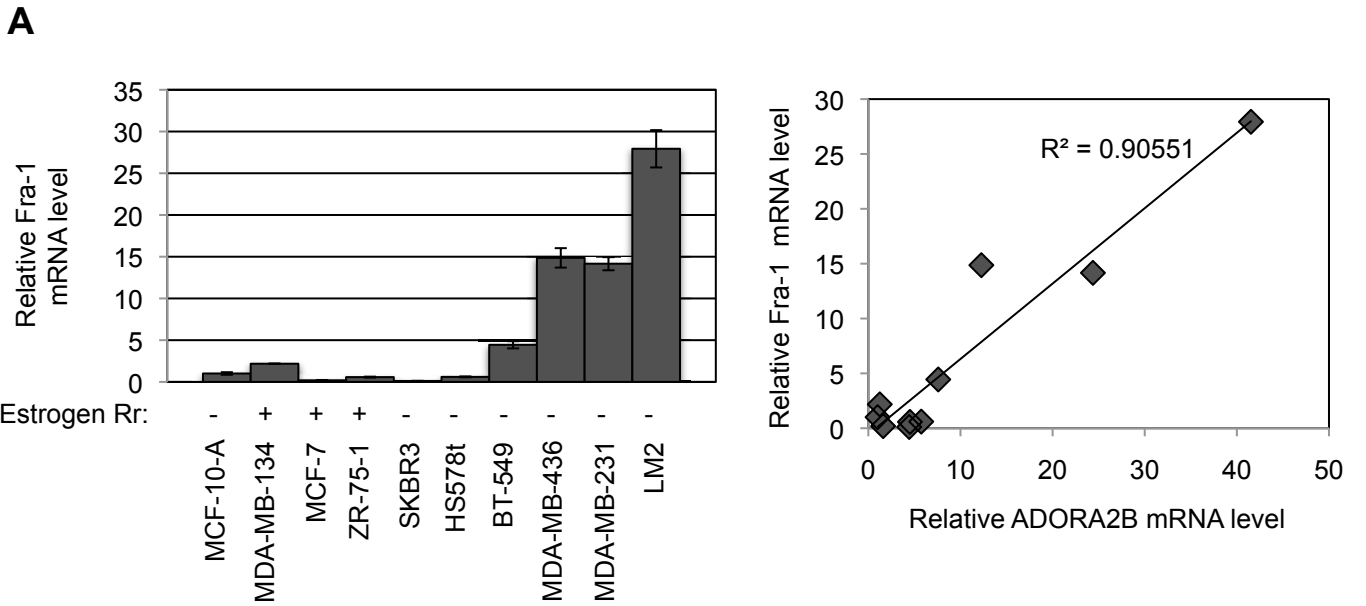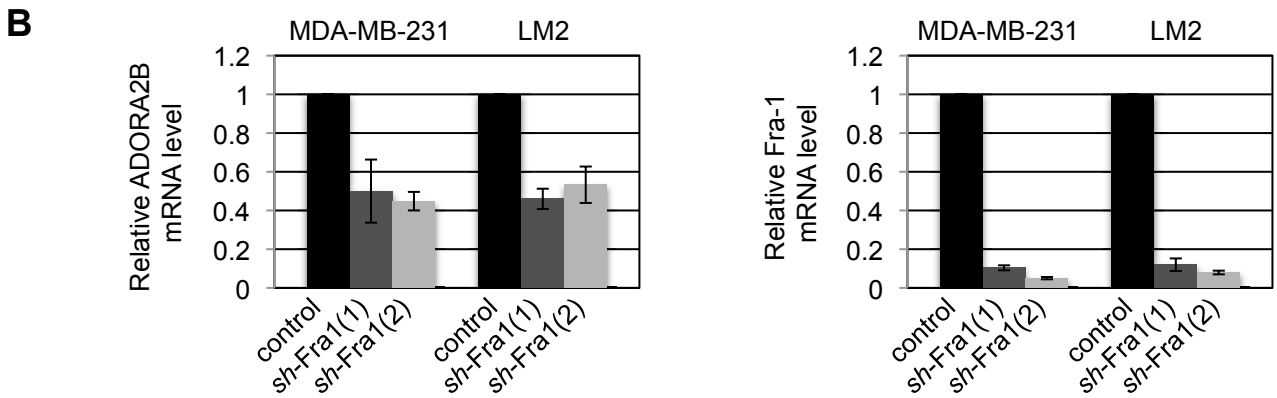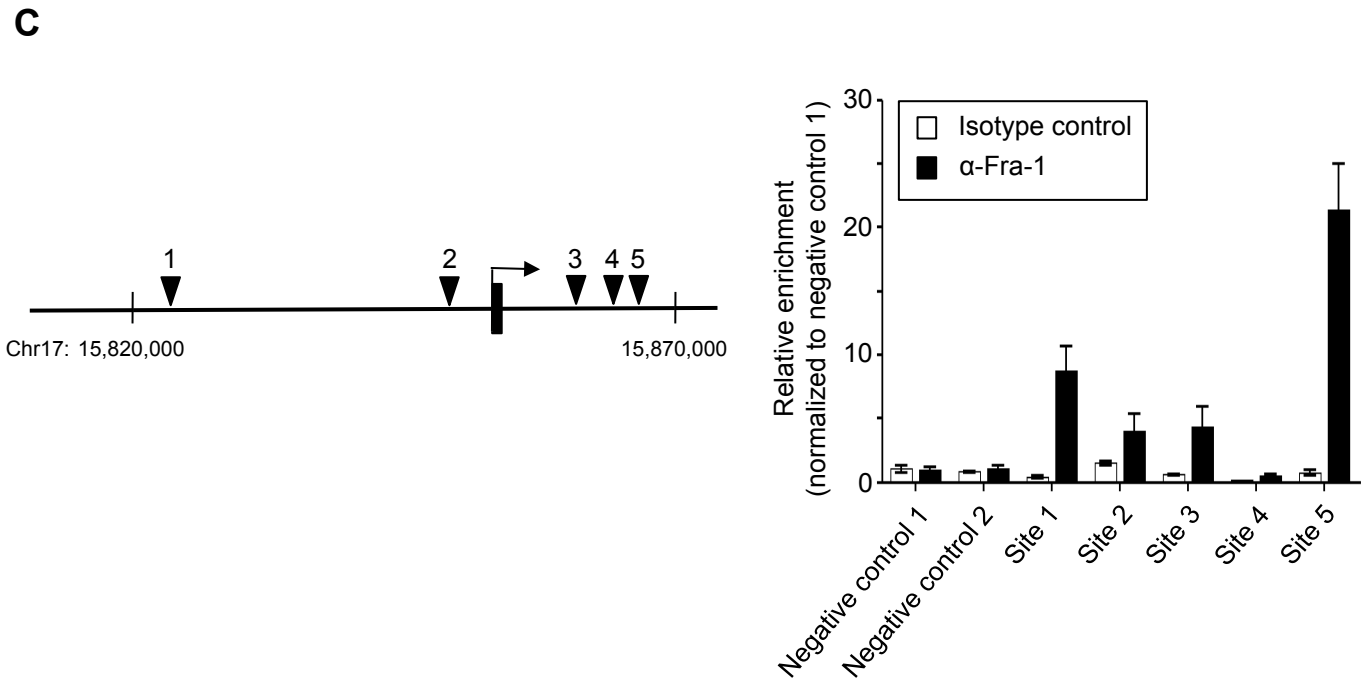

**A**

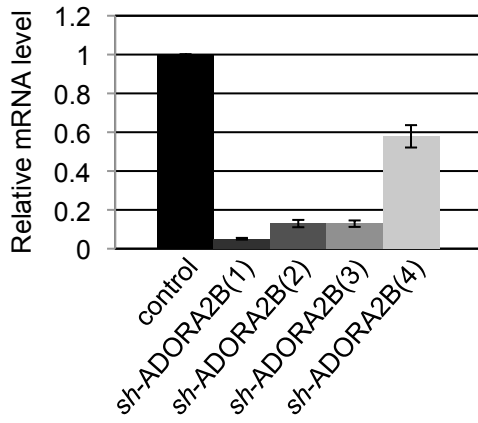

**B**

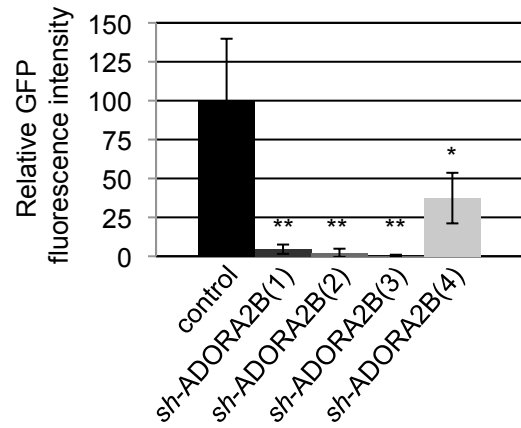

**C**

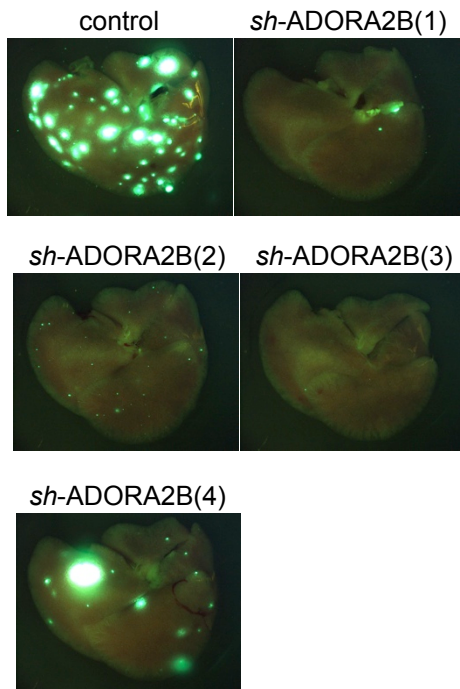

**D**

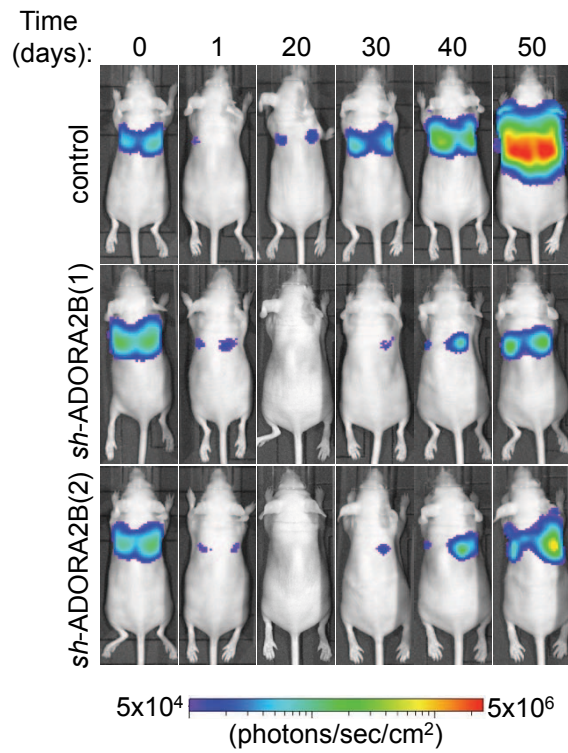

**E**

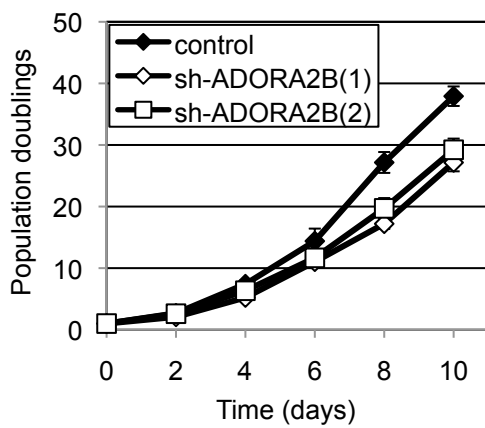

**F**

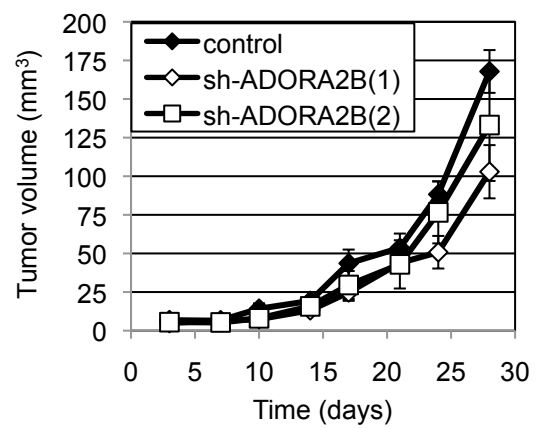

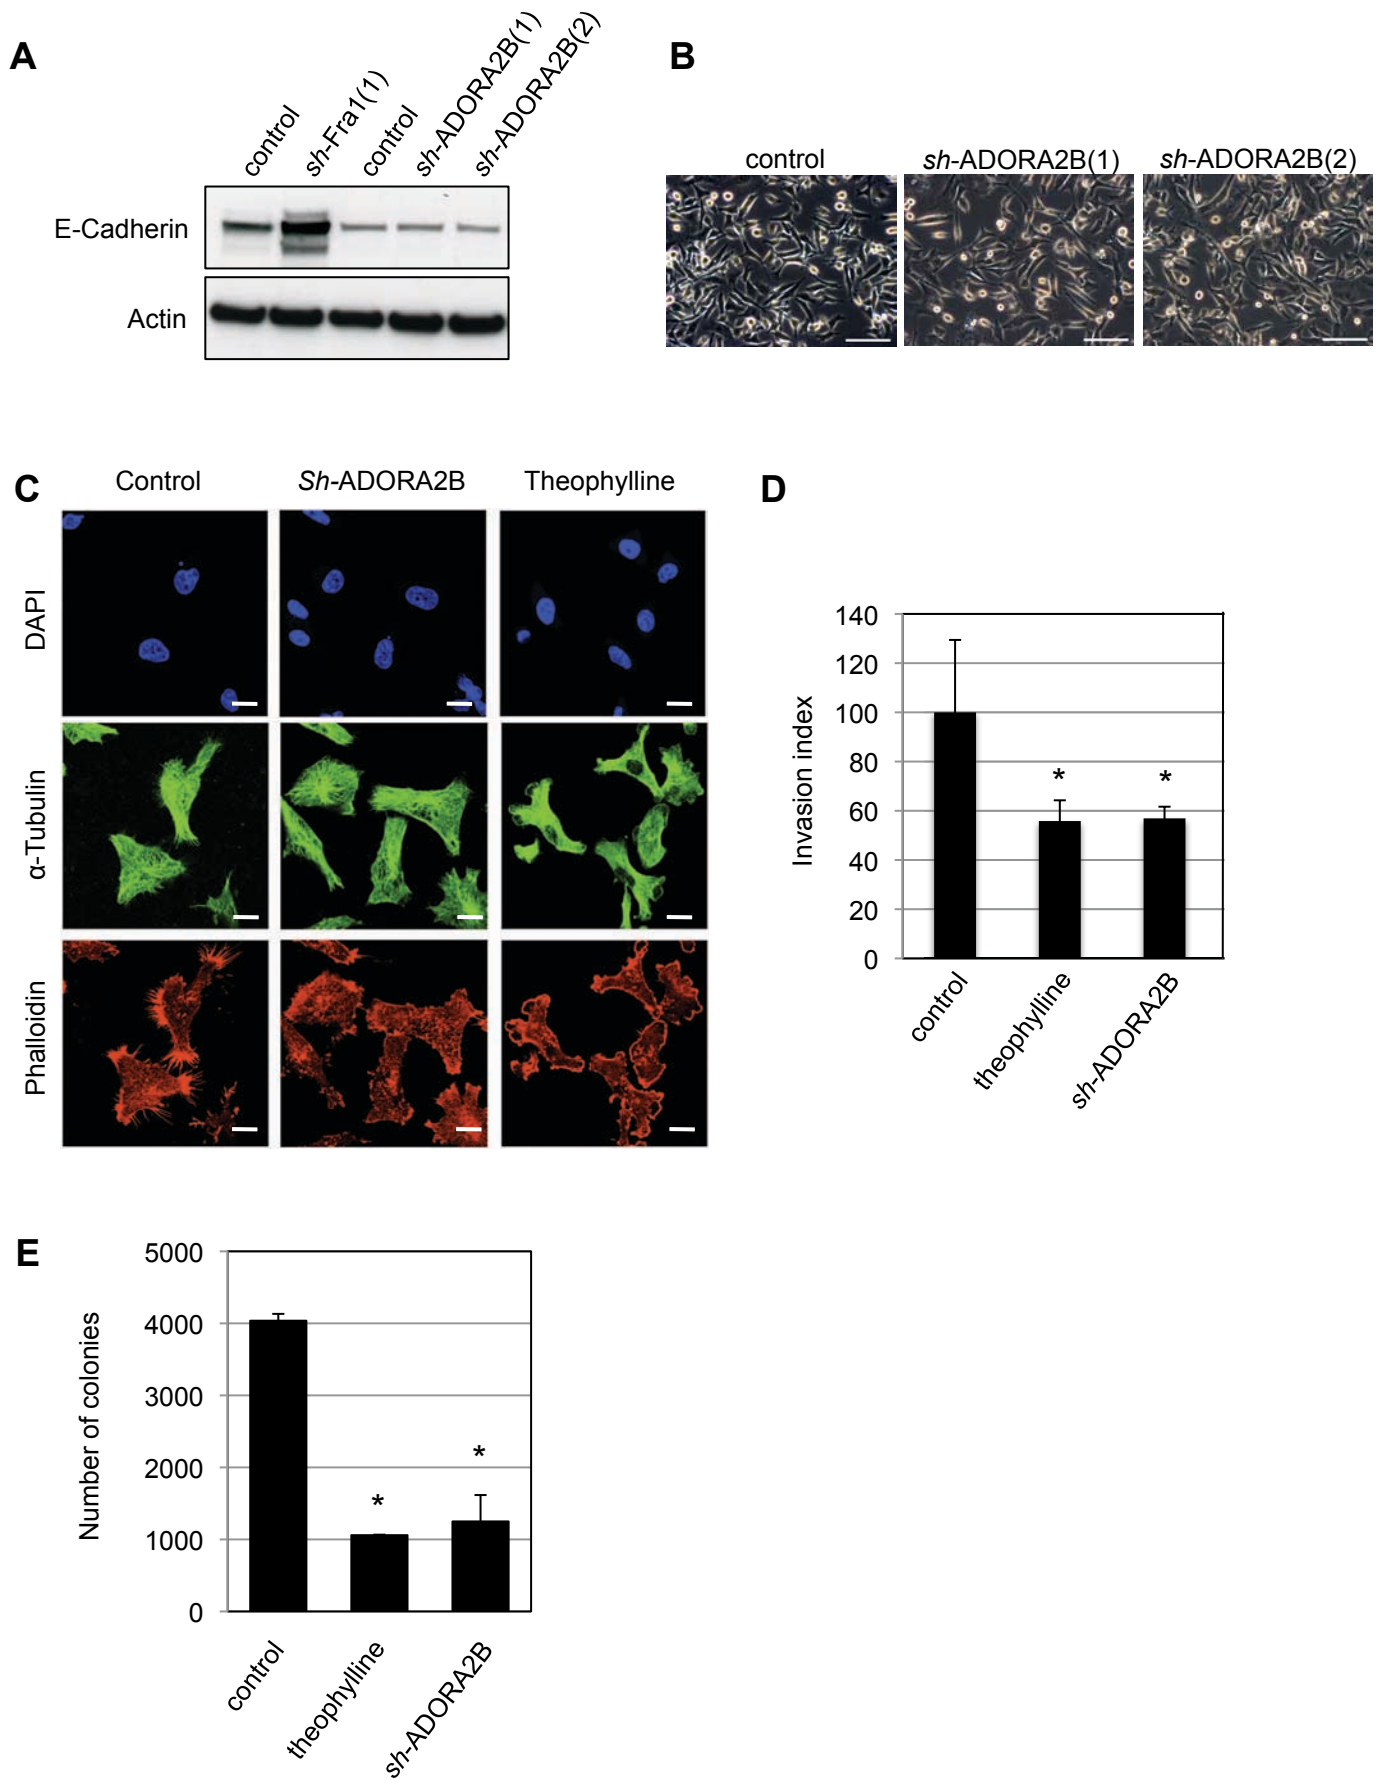

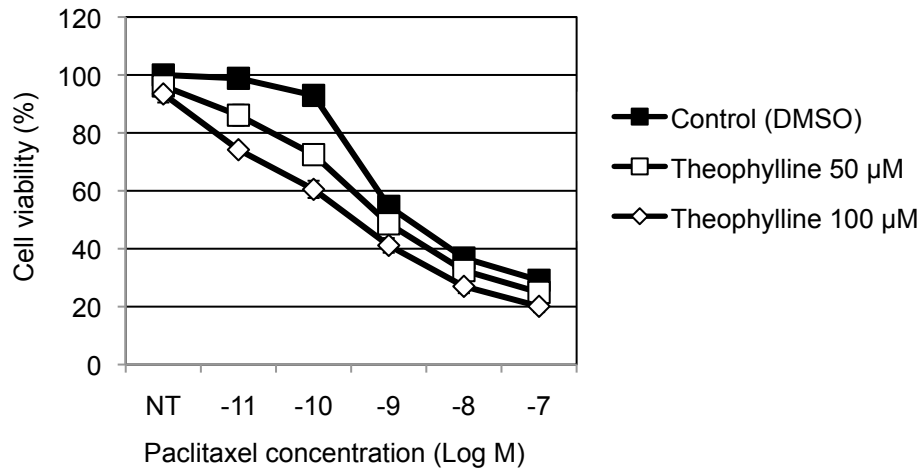

**A**

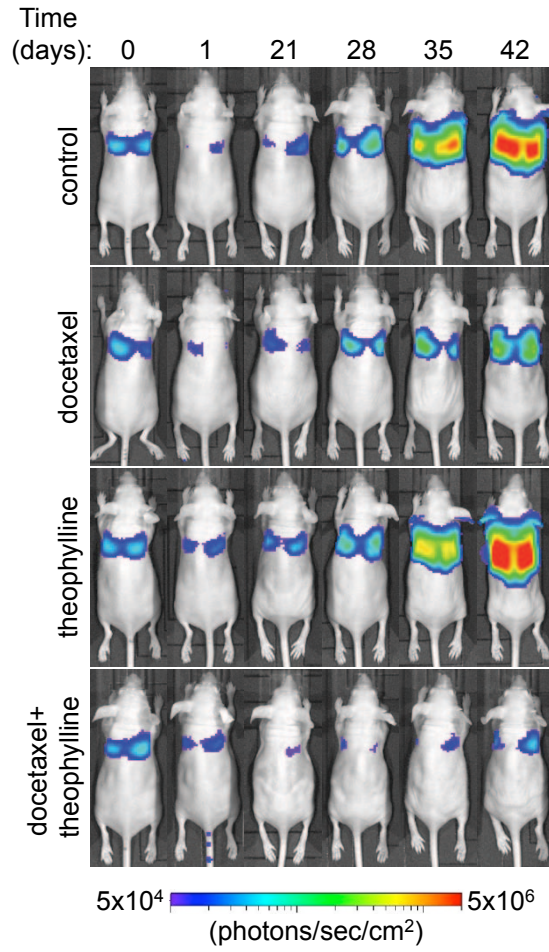

**B**

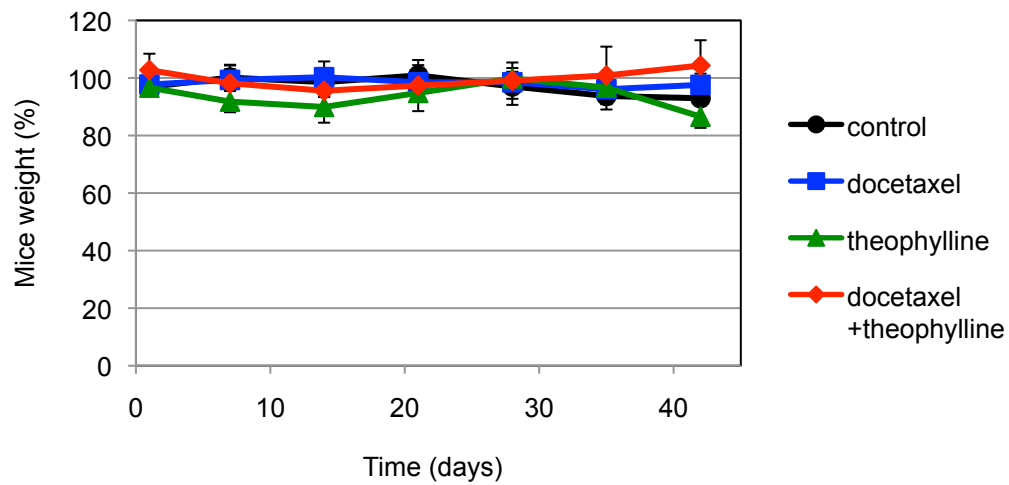



## Supplementary figures legends

**Supplementary Figure 1. Fra-1 is upregulated and is a major component of AP-1 DNA-binding complexes in active TrkB expressing cells.** **A.** Fra-1 expression levels measured by quantitative RT-PCR (upper panel) and western blotting (lower panel; n for PCR = 3, error bars: S.D. Asterisk, different from control with  $P < 0.01$  based on a one-sided Student's t test). **B.** Gel shift analysis measuring AP-1 DNA-binding activity. Supershift with Fra-1 antibody was performed to determine the relative contribution of Fra-1 to the total DNA-binding activity (empty arrows indicate supershifted AP-1 complex). Data are representative of three independent experiments.

**Supplementary Figure 2. Fra-1 depletion does not affect the growth of primary TrkB-driven tumor xenografts.** *In vivo* growth curve of tumors formed by RK3E<sup>TB</sup> tumor cells injected subcutaneously into nude mice, as a function of Fra-1 depletion (n=6, error bars: S.E.). Data are representative of three independent experiments.

**Supplementary Figure 3. Fra-1 is required for the downregulation of epithelial characteristics, and for migration and invasion of TrkB-expressing tumor cells.** **A.** Phase contrast micrographs showing the effects of Fra-1 depletion on the morphology of RK3ETB cells. Images were taken at 40x magnification. **B.** Detection by immunofluorescence of Fra-1 and E-cadherin in cells as indicated. Parental RK3E cells are included as reference. **C.** Migration (upper panel) and invasion (lower panel) capacities as a function of Fra-1 depletion (n=3, error bars: S.D. Asterisk, different from control clones with  $P < 0.001$  based on a one-

way ANOVA followed by PLSD test). Data are representative of three independent experiments.

**Supplementary Figure 4. Fra-1 depletion in RK3E<sup>TB</sup> cells reverts morphological transformation.** **A.** Fra-1 expression levels in polyclonal pools of RK3E<sup>TB</sup> cells containing empty vector or independent shRNAs targeting Fra-1, as indicated. **B.** Phase contrast micrographs of the cells described in A. **C.** Restoration of an RNAi-resistant rat Fra-1 cDNA in sh-Fra1(1) expressing RK3E<sup>TB</sup> cells, resulting in morphological transformation. **D.** Phase contrast micrographs of the cells described in C. In both A. and C., the panels were taken from a single blot and  $\alpha$ -tubulin serves as loading control. Cells were photographed at 40x magnification. Data are representative of three independent experiments.

**Supplementary Figure 5. Fra-1 and the EMT regulators Twist, Snail and Zeb1 control the expression of a common set of genes.** **A.** Gene-expression overlap determined by the microarray analysis of the transcriptome of RK3E<sup>TB</sup> cells expressing shRNAs against Twist, Snail or Zeb1 (as in Smit & Peeper, 2011 *Oncogene* 30:3735-44). **B.** Common microarray outliers between RK3E<sup>TB</sup> cells expressing two different shRNAs against Fra1 were overlaid with the 52 common Twist, Snail, Zeb1 targets identified as in A, revealing an overlap of 40 genes. **C.** Heatmap of the expression of the 40 genes commonly regulated upon silencing of Twist, Snail, Zeb1 or Fra-1.

**Supplementary Figure 6. Fra-1 is commonly overexpressed in human breast cancer cell lines and is required for lung metastasis of breast cancer cells.** **A.** Western-blot analysis of Fra-1 expression in human breast cancer cell lines.  $\beta$ -actin serves as loading control. **B.** Fluorescence imaging of the lungs of mice inoculated intravenously with  $10^6$  GFP-labeled

LM2 cells expressing a control or sh-Fra-1 vector as indicated, 35 days after inoculation. **C.** Quantification of the fluorescence in the lungs of mice described in B. (n=4 lungs, error bars: S.D. Asterisk, different from control with  $P < 0.001$  based on a one-way ANOVA followed by PLSD test). **D.** Fluorescence imaging of the lungs of mice inoculated intravenously with  $10^5$  GFP-labeled LM2 cells expressing a control or sh-Fra-1 vector as indicated, 35 days after inoculation. **E.** Quantification of the fluorescence in the lungs of mice described in D. (n=4 lungs, error bars: S.D. Asterisk, different from control with  $P < 0.001$  based on a one-way ANOVA followed by PLSD test). **F.** Images of the lungs (upper panel) and haematoxylin-eosin stained sections of the lungs (lower panel, scale bar: 100  $\mu\text{m}$ ; T: Tumor) of mice that were injected intravenously with  $1.10^6$  MDA-MB-231 cells expressing independent Fra-1 shRNAs as indicated, photographed at 3 months after inoculation. **G.** Macroscopic quantification of the lung metastases formed by MDA-MB-231 cells described in F (n=5, error bars: S.D. Asterisk, different from control clones with  $P < 0.001$  based on a one-way ANOVA followed by PLSD test). Data are representative of two (B-G) or three independent experiments (A).

**Supplementary Figure 7. Selective pressure for restoration of Fra-1 expression in pulmonary metastases formed by Fra-1-depleted cells.** Immunohistochemical analysis of human Fra-1 or GFP expression in the lungs of mice inoculated by control or Fra-1-depleted LM2 cells, 114 days after inoculation of Fra-1-depleted cells (scale bar: 100  $\mu\text{m}$ ). As a control for the presence cells early after injection, staining of lung sections performed 90 minutes after inoculation of control and Fra-1-depleted cells is also shown. Data are representative of two independent experiments.

**Supplementary Figure 8. Fra-1 is required for metastasis to multiple organs. A.**

Representative bioluminescence images of mice injected into the left cardiac ventricle with  $10^5$  MDA-MB-231 cells expressing a control or sh-Fra1 vector, as indicated, 49 days after cells inoculation. **B.** Quantification of the luminescence signal in the mice described in A. as a function of time (n=8-9, error bars: S.E. Asterisk, different from control for the two sh-Fra1 groups with \*  $P < 0.05$  or \*\*  $P < 0.01$  based on a two-tailed Wilcoxon-signed rank test). **C.** Kaplan-Meier curves for survival of the mice described in A and B. Mice were euthanized when clinical symptoms became apparent (displayed P-value is based on a Log-Rank test). **D.** Haematoxylin-eosin staining of histological sections (M: metastasis) from control mice described in A and B (scale bar: 100  $\mu\text{m}$ ). **E.** Representative fluorescence imaging of the lungs of nude mice injected in the 4<sup>th</sup> mammary fat pad with GFP-labeled LM2 cells expressing independent Fra-1 sh-RNAs, 6 weeks after surgical removal of the primary tumor. **F.** Quantification of the metastatic nodules in the lungs of mice described in E (n=10). **G.** Weight of the orthotopic LM2 tumors upon surgical removal after one month of growth, as a function of Fra-1 depletion (n=10, \*  $P < 0.001$ ). Data are representative of two independent experiments.

**Supplementary Figure 9. Fra-1 is required for EMT induced by MEK activation. A.**

Detection by immunofluorescence of E-cadherin (upper panel) and cytoskeletal actin (by phalloidin staining; lower panel) of control and Fra-1-silenced MDA-MB-231 cells. **B.** Western-blot analysis of E-Cadherin, Fra-1 and phospho-ERK levels in the human breast cancer cell lines LM2, MDA-MB-231 and ZR75-1, treated with the indicated concentrations of the MEK inhibitor UO126. ZR75-1 cells, which are negative for Fra-1 and positive for E-Cadherin are shown as negative controls. **C.** Western-blot analysis of E-Cadherin, Fra-1 and Phospho-ERK levels in LM2 cells stably transfected with an empty vector or a vector

encoding the stabilized Fra-1 mutant S252D/S265D (Basbous J. et al., 2007) treated with 10  $\mu$ M of the MEK inhibitor UO126, as indicated. Panels in C were taken from a single blot. Data are representative of three independent experiments.

**Supplementary Figure 10. A Fra-1-associated gene-expression profile accurately predicts clinical outcome of different breast cancer subtypes.** Kaplan-Meier curves for signature-high samples and signature-low samples for time to distant metastasis (if available) or relapse on available breast cancer datasets. Patients were sorted based on their molecular subtype and stratified using the Fra-1 classifier. Also shown are the one-sided log-rank p-value and the Cox proportional hazards model hazard ratio between the signature-high and signature-low groups (see Methods).

**Supplementary Figure 11. ADORA2B is expressed in ER-negative breast cancer and cells lines derived thereof.** **A.** Expression levels of ADORA2B in the indicated breast cancer cell lines measured by quantitative RT-PCR (n=3, error bars: S.D.). The estrogen receptor status of the cell lines is also indicated. **B.** Expression levels of ADORA1, ADORA2A, ADORA2B and ADORA3 in the indicated breast epithelial or breast cancer cell lines measured by quantitative RT-PCR (n=3, error bars: S.D.). **C.** ADORA2B mRNA expression levels in the indicated breast cancer sub-groups obtained from the indicated datasets. Expression levels are different from triple-negative group with  $P < 10e^{-14}$  for ER<sup>+</sup>Her2<sup>-</sup> group,  $P = 5.81e^{-8}$  for ER<sup>+</sup>Her2<sup>+</sup> group,  $P = 0.001$  for ER<sup>-</sup>Her2<sup>+</sup> group, based on a random effects model (expression values from the different datasets were combined for each subgroup).

**Supplementary Figure 12. ADORA2B expression is regulated by Fra-1 in human breast cancer cells.** **A.** Expression levels of ADORA2B in the indicated breast cancer cell lines

measured by quantitative RT-PCR (n=3, error bars: S.D.) (left panel) and correlation between Fra-1 and ADORA2B mRNA expression (as determined in Figure S11C) in these cell lines (right panel). **B.** ADORA2B and Fra-1 expression levels in Fra-1-depleted MDA-MB-231 and LM2 cells, as indicated, measured by quantitative RT-PCR (n=3, error bars: S.D.). **C.** Schematic position of putative Fra-1 binding sites (numbered black arrows) identified in the promoter and first intron region of the *adora2b* gene (left panel) and relative enrichment for genomic DNA sequences spanning these individual sites in chromatin immunoprecipitation experiments using anti-Fra-1 or isotype control antibodies (right panel) (n=3, error bars: S.D.). Data are representative of three independent experiments.

**Supplementary Figure 13. ADORA2B is required for breast cancer cells metastasis. A.** ADORA2B expression levels in LM2 cells expressing 4 independent sh-RNAs targeting ADORA2B, as indicated, measured by quantitative RT-PCR (n=3, error bars: S.D.). **B.** Quantification of the fluorescence in the lungs of nude mice inoculated intravenously with  $10^5$  GFP-labeled LM2 cells expressing independent ADORA2B shRNAs as indicated, 35 days after inoculation (n=4 lungs, error bars: S.D. Asterisk, different from control with \*  $P < 0.05$  or \*\*  $P < 0.005$  based on a one-way ANOVA followed by PLSD test). **C.** Fluorescence imaging of the lungs of mice described in C. **D.** Representative bioluminescence images of mice injected intravenously ( $2 \times 10^5$  cells) with LM2 cells expressing a control or sh-ADORA2B vector at different time points as indicated. **E.** *In vitro* proliferation curve of control and ADORA2B-silenced LM2 cells (n=3, error bars: S.D.). **F.** *In vivo* growth curve of tumors formed by control and ADORA2B-silenced LM2 cells injected in the 4<sup>th</sup> mammary fat pad on both flanks (n=6 tumors, error bars: S.E.). Data are representative of two independent experiments.

**Supplementary Figure 14. ADORA2B is not required for maintenance of EMT-like**

**characteristics but is involved in migration and invasion of breast cancer cells. A.** E-cadherin expression levels measured by western blotting in LM2 cells expressing a control vector, a sh-RNA targeting Fra-1 or independent sh-RNAs targeting ADORA2B as indicated. Actin serves as loading control. **B.** Phase contrast micrographs of LM2 cells expressing a control vector or independent sh-RNAs targeting ADORA2B as indicated (scale bar: 100  $\mu\text{m}$ ). **C.** Representative immunofluorescence imaging of the cytoskeleton of LM2 cells expressing a sh-ADORA2B construct or treated with 100  $\mu\text{M}$  theophylline. Individual images of the staining of DNA with DAPI (upper panel), of  $\alpha$ -tubulin (middle panel) and of F-actin (lower panel) are shown (scale bar: 10  $\mu\text{m}$ ). **D.** Invasion capacities of LM2 cells as a function of ADORA2B depletion or theophylline treatment (100  $\mu\text{M}$ ) (n=3, error bars: S.D. Asterisk, different from excipient-treated control cells with  $P < 0.05$  based on a one-way ANOVA followed by PLSD test). **E.** Colony forming activity of LM2 cells in soft agar assays as a function of ADORA2B depletion or theophylline treatment (100  $\mu\text{M}$ ) (n=3, error bars: S.D. Asterisk, different from excipient-treated control cells with  $P < 0.001$  based on a one-way ANOVA followed by PLSD test). Data are representative of 3 independent experiments.

**Supplementary Figure 15. Theophylline can potentiate the cytotoxic effect of paclitaxel**

***in vitro*.** Dose-response curves of LM2 cells treated with paclitaxel, either alone (DMSO) or in the presence of the indicated concentration of theophylline (n=4, error bars: S.D.). Values were normalized to untreated cells (without paclitaxel or theophylline). Data are representative of three independent experiments.

**Supplementary Figure 16. Co-treatment of docetaxel and theophylline does not induce**

**weight loss in mice. A.** Representative bioluminescence images of mice injected

intravenously ( $2 \times 10^5$  cells) with LM2 cells and receiving the indicated treatment (docetaxel 4 mg/kg i.p. weekly and/or theophylline 10 mM in drinking water) at different time points as indicated (time points 7 and 14 days were excluded from the figure because bioluminescence signal was below the scale range). **B.** Weight curves as a function of time of mice injected intravenously ( $2 \times 10^5$  cells) with LM2 cells and receiving the indicated treatment (docetaxel 4 mg/kg i.p. weekly and/or theophylline 10 mM in drinking water). Values were normalized to the weight of the mice at the time of cell injection. Data are representative of two independent experiments.
